# Supplementary material for: Interferon-β-induced miR-1 alleviates toxic protein accumulation by controlling autophagy
Source: eLife journal article supplement (doi:10.7554/elife.49930), 2019-12-04
Supplement: supp [file elife-49930-supp-v1.zip]

***C. elegans***

```
3' AUGUAUGAAGAAA---UGUAAGGU 5' cel-mir-1
      ||||           |||||
5' GUUCACUUAUUUUCUACAUUCCA 3' tbc-7 3'UTR
```

***D. melanogaster***

```
3' GAGGUAUGAAGAAAU GUAAGGU 5' dme-miR-1
      |||||
5' AUUAUUUUAAGAUUC CAUCCA 3' Skywalker 3'UTR
```

***H. sapiens***

```
3' UAUGUAUGAAGAAAUGUAAGGU 5' hsa-miR-1
      |||||
5' CUUCCUUUUCGAUAACAUCCU 3' TBC1D15 3'UTR
```
