# Supplementary material for: Interferon-β-induced miR-1 alleviates toxic protein accumulation by controlling autophagy
Source: eLife. 2019 Dec 4;8:e49930. doi: 10.7554/eLife.49930 (PMC6914338; doi:10.7554/eLife.49930)
Supplement: Supplementary file 1. — Predicted mir-1 target genes (TargetScanWorm release 6.2) showing the number and type of putative conserved mir-1 binding sites in their 3′UTRs. Aggregate PCT = probability of conserved targeting. [file elife-49930-supp1.xlsx]

## Sheet: Sheet1
Gene name	Wormbase Gene ID	Total # sites	8mer-1A	8mer-1U	7mer-m8	7mer-1A	6mer	6mer-1A	Aggregate Pct
dct-1	WBGene00015776	2	1	1	0	0	0	0	0.99
R02E12.5	WBGene00019829	2	1	0	1	0	0	0	0.99
tbc-7	WBGene00016292	2	1	0	0	1	0	0	0.98
F09F7.5	WBGene00017302	2	1	0	0	1	0	0	0.98
Y54G2A.26	WBGene00021890	2	0	1	0	0	1	0	0.97
egl-8	WBGene00001177	2	0	1	0	0	1	0	0.96
F17C11.1	WBGene00008913	2	0	0	1	0	1	0	0.96
vha-1	WBGene00006910	1	1	0	0	0	0	0	0.95
frm-8	WBGene00001494	2	0	1	0	1	0	0	0.95
T05C1.1	WBGene00020248	1	1	0	0	0	0	0	0.95
vha-13	WBGene00013025	1	1	0	0	0	0	0	0.95
vha-14	WBGene00010130	1	1	0	0	0	0	0	0.95
vha-5	WBGene00006914	1	1	0	0	0	0	0	0.95
chitinase	WBGene00007425	1	1	0	0	0	0	0	0.95
F49C12.12	WBGene00009881	1	1	0	0	0	0	0	0.95
T07D4.2	WBGene00011579	1	1	0	0	0	0	0	0.95
T25B9.3	WBGene00012009	1	1	0	0	0	0	0	0.95
aakb-2	WBGene00012928	1	1	0	0	0	0	0	0.95
gcy-28	WBGene00020131	1	1	0	0	0	0	0	0.94
chs-2	WBGene00000497	1	1	0	0	0	0	0	0.94
B0361.7	WBGene00015161	1	1	0	0	0	0	0	0.94
transpeptidase	WBGene00019204	2	1	0	0	1	0	0	0.94
unc-33	WBGene00006769	1	1	0	0	0	0	0	0.94
C38H2.2	WBGene00008019	1	1	0	0	0	0	0	0.94
F32B5.7	WBGene00017980	1	1	0	0	0	0	0	0.94
C06H2.3	WBGene00007387	1	1	0	0	0	0	0	0.94
fbn-1	WBGene00022816	1	1	0	0	0	0	0	0.93
F25B3.2	WBGene00009099	1	1	0	0	0	0	0	0.93
C33H5.18	WBGene00016384	2	0	0	0	1	1	0	0.93
egl-44	WBGene00001208	2	0	0	0	0	2	0	0.92
F21D5.5	WBGene00009010	1	1	0	0	0	0	0	0.91
lin-26	WBGene00003012	1	0	0	0	1	0	0	0.91
plc-3	WBGene00004038	1	0	0	0	0	1	0	0.9
vha-11	WBGene00006920	1	1	0	0	0	0	0	0.9
cnc-2	WBGene00000556	1	1	0	0	0	0	0	0.9
let-363	WBGene00002583	1	1	0	0	0	0	0	0.9
asd-2	WBGene00006423	2	1	0	0	1	0	0	0.9
T13G4.3	WBGene00020490	1	1	0	0	0	0	0	0.88
opt-3	WBGene00003878	1	0	1	0	0	0	0	0.88
M02D8.4	WBGene00019730	1	0	1	0	0	0	0	0.88
F52F12.9	WBGene00009942	1	1	0	0	0	0	0	0.87
hpk-1	WBGene00001994	1	0	0	0	1	0	0	0.87
gpa-7	WBGene00001669	1	0	0	0	1	0	0	0.87
ras-2	WBGene00004311	1	0	0	0	1	0	0	0.87
F42H10.5	WBGene00018369	1	0	0	0	1	0	0	0.87
F53H4.5	WBGene00010010	1	0	0	0	1	0	0	0.87
Y59H11AR.2	WBGene00022010	1	0	0	0	1	0	0	0.87
cka-1	WBGene00000509	1	1	0	0	0	0	0	0.87
F32D1.2	WBGene00017982	1	1	0	0	0	0	0	0.87
snf-11	WBGene00004910	1	0	1	0	0	0	0	0.87
vha-17	WBGene00009882	1	0	1	0	0	0	0	0.87
vha-4	WBGene00006913	1	0	1	0	0	0	0	0.87
Y76A2B.4	WBGene00013576	1	0	1	0	0	0	0	0.87
gei-13	WBGene00001570	1	0	0	1	0	0	0	0.87
hyl-2	WBGene00002044	1	0	0	1	0	0	0	0.87
pkc-1	WBGene00004032	1	0	0	1	0	0	0	0.87
vha-15	WBGene00020507	1	0	0	1	0	0	0	0.87
ztf-11	WBGene00009939	1	0	0	1	0	0	0	0.87
egl-10	WBGene00001179	1	0	0	1	0	0	0	0.87
ace-1	WBGene00000035	1	0	0	1	0	0	0	0.87
daf-16	WBGene00000912	1	0	0	1	0	0	0	0.87
rbc-1	WBGene00004313	1	0	0	1	0	0	0	0.87
tag-233	WBGene00044071	1	0	0	1	0	0	0	0.87
twk-7	WBGene00006662	1	0	0	1	0	0	0	0.87
M01F1.7	WBGene00010813	1	0	0	1	0	0	0	0.87
abts-3	WBGene00019018	1	0	0	1	0	0	0	0.87
dpy-10	WBGene00001072	1	0	0	1	0	0	0	0.87
2001-06-01	WBGene00012005	1	0	0	1	0	0	0	0.87
kpc-1	WBGene00002232	1	0	0	1	0	0	0	0.87
lag-2	WBGene00002246	1	0	0	1	0	0	0	0.87
mlk-1	WBGene00003374	1	0	0	1	0	0	0	0.87
ncx-1	WBGene00003566	1	0	0	1	0	0	0	0.87
pkc-2	WBGene00004033	1	0	0	1	0	0	0	0.87
pqn-67	WBGene00004150	1	0	0	1	0	0	0	0.87
qdpr-1	WBGene00011398	1	0	0	1	0	0	0	0.87
rnr-1	WBGene00004391	1	0	0	1	0	0	0	0.87
sel-1	WBGene00004759	1	0	0	1	0	0	0	0.87
syd-2	WBGene00006364	1	0	0	1	0	0	0	0.87
syg-2	WBGene00007750	1	0	0	1	0	0	0	0.87
tag-173	WBGene00006518	1	0	0	1	0	0	0	0.87
tag-232	WBGene00044077	1	0	0	1	0	0	0	0.87
vha-9	WBGene00006918	1	0	0	1	0	0	0	0.87
2RSSE.1	WBGene00007064	1	0	0	1	0	0	0	0.87
C10E2.6	WBGene00015676	1	0	0	1	0	0	0	0.87
F14H12.3	WBGene00017471	1	0	0	1	0	0	0	0.87
F21A10.2	WBGene00008999	1	0	0	1	0	0	0	0.87
F33D4.7	WBGene00017999	1	0	0	1	0	0	0	0.87
F36G3.1	WBGene00009482	1	0	0	1	0	0	0	0.87
F55G1.1	WBGene00018899	1	0	0	1	0	0	0	0.87
F57B7.2	WBGene00010192	1	0	0	1	0	0	0	0.87
H01G02.1	WBGene00010348	1	0	0	1	0	0	0	0.87
R06F6.7	WBGene00011070	1	0	0	1	0	0	0	0.87
R08C7.12	WBGene00019955	1	0	0	1	0	0	0	0.87
T12A2.8	WBGene00020442	1	0	0	1	0	0	0	0.87
W08D2.5	WBGene00012341	1	0	0	1	0	0	0	0.87
Y22D7AR.6	WBGene00021260	1	0	0	1	0	0	0	0.87
Y57G7A.10	WBGene00021973	1	0	0	1	0	0	0	0.87
Y73B6BL.30	WBGene00022251	1	0	0	1	0	0	0	0.87
ZK669.4	WBGene00014054	1	0	0	1	0	0	0	0.87
ZK858.6	WBGene00014119	1	0	0	1	0	0	0	0.87
dyc-1	WBGene00001116	1	0	1	0	0	0	0	0.87
bar-1	WBGene00000238	1	0	1	0	0	0	0	0.87
cwn-2	WBGene00000858	1	0	1	0	0	0	0	0.87
Peroxidase	WBGene00017968	1	0	1	0	0	0	0	0.87
apa-2	WBGene00000161	1	0	1	0	0	0	0	0.86
unc-44	WBGene00006780	1	1	0	0	0	0	0	0.86
vha-8	WBGene00006917	1	1	0	0	0	0	0	0.86
C15H9.4	WBGene00015800	1	1	0	0	0	0	0	0.86
acs-1	WBGene00018488	1	1	0	0	0	0	0	0.86
dpy-2	WBGene00001064	1	1	0	0	0	0	0	0.86
ets-4	WBGene00017687	1	1	0	0	0	0	0	0.86
ifb-2	WBGene00002054	1	1	0	0	0	0	0	0.86
C48B6.10	WBGene00016746	1	1	0	0	0	0	0	0.86
R06C1.4	WBGene00011059	1	1	0	0	0	0	0	0.86
F54C8.7	WBGene00010040	1	0	1	0	0	0	0	0.86
vha-3	WBGene00006912	1	0	1	0	0	0	0	0.86
vha-19	WBGene00021952	1	0	0	0	1	0	0	0.86
E01G6.2	WBGene00008450	1	0	0	0	1	0	0	0.86
F30F8.3	WBGene00009272	1	0	0	0	1	0	0	0.86
rnf-5	WBGene00004381	1	0	1	0	0	0	0	0.86
uda-1	WBGene00010697	1	0	1	0	0	0	0	0.86
T23B5.3	WBGene00011940	2	0	0	0	1	1	0	0.85
vha-12	WBGene00006921	1	0	0	0	1	0	0	0.84
flp-10	WBGene00001453	1	0	0	0	1	0	0	0.84
zyx-1	WBGene00006999	1	0	0	0	1	0	0	0.84
B0403.3	WBGene00015167	1	0	0	0	1	0	0	0.84
C47G2.5	WBGene00008166	1	0	0	0	1	0	0	0.84
glt-6	WBGene00001624	1	0	0	0	1	0	0	0.84
nep-1	WBGene00013926	1	0	0	0	1	0	0	0.84
sdn-1	WBGene00004749	1	0	0	0	1	0	0	0.84
vha-10	WBGene00006919	1	0	0	0	1	0	0	0.84
C11E4.1	WBGene00007516	1	0	0	0	1	0	0	0.84
ben-1	WBGene00000248	1	1	0	0	0	0	0	0.84
somi-1	WBGene00010868	1	0	0	0	1	0	0	0.84
T20B12.7	WBGene00020604	1	0	0	0	1	0	0	0.84
C09D4.4	WBGene00015635	2	1	0	0	1	0	0	0.83
exc-7	WBGene00001368	1	0	0	0	1	0	0	0.83
F57G12.1	WBGene00010221	1	0	0	0	1	0	0	0.83
pap-1	WBGene00012528	1	0	0	0	1	0	0	0.82
C17E4.10	WBGene00007647	1	0	0	0	1	0	0	0.82
pqn-73	WBGene00004155	1	0	0	0	1	0	0	0.82
pst-2	WBGene00018827	1	0	0	0	1	0	0	0.82
raga-1	WBGene00006414	1	0	0	0	1	0	0	0.82
rga-2	WBGene00013135	1	0	0	0	1	0	0	0.82
scpl-3	WBGene00021629	1	0	0	0	1	0	0	0.82
ttx-1	WBGene00006652	1	0	0	0	1	0	0	0.82
F55C12.5	WBGene00018872	1	0	0	0	1	0	0	0.82
T23F11.4	WBGene00011956	1	0	0	0	1	0	0	0.82
phospholipase	WBGene00009456	1	0	0	0	1	0	0	0.82
prx-14	WBGene00004199	1	1	0	0	0	0	0	0.82
mpk-1	WBGene00003401	1	0	0	0	1	0	0	0.81
blmp-1	WBGene00003847	1	0	0	0	1	0	0	0.81
B0495.7	WBGene00015206	1	0	1	0	0	0	0	0.81
pde-2	WBGene00011146	1	0	1	0	0	0	0	0.81
lin-14	WBGene00003003	1	0	0	0	1	0	0	0.8
F59B2.2	WBGene00010307	1	0	0	0	1	0	0	0.8
R10H10.6	WBGene00011224	1	0	0	0	1	0	0	0.8
sma-9	WBGene00004862	1	1	0	0	0	0	0	0.8
tag-275	WBGene00016423	1	0	1	0	0	0	0	0.8
C06G3.5	WBGene00015551	1	0	1	0	0	0	0	0.8
ZK682.2	WBGene00022788	1	0	1	0	0	0	0	0.8
snf-3	WBGene00004902	1	0	0	0	1	0	0	0.78
F32D1.9	WBGene00017988	1	0	0	0	1	0	0	0.78
M106.8	WBGene00077658	1	0	0	0	1	0	0	0.78
ceh-37	WBGene00000458	1	0	0	0	1	0	0	0.77
nhr-71	WBGene00003661	1	0	0	0	1	0	0	0.77
D1005.1	WBGene00016995	1	0	0	0	1	0	0	0.77
T10B10.4	WBGene00011681	1	0	0	0	1	0	0	0.77
F45E1.1	WBGene00018462	1	0	0	0	1	0	0	0.76
tag-130	WBGene00006477	1	0	0	0	1	0	0	0.76
ttll-5	WBGene00008331	1	0	0	0	1	0	0	0.76
T05B4.10	WBGene00020241	1	0	0	0	1	0	0	0.76
D1005.3	WBGene00016997	1	0	0	0	1	0	0	0.75
nos-3	WBGene00003785	1	0	0	0	1	0	0	0.75
ZC328.3	WBGene00022593	1	0	0	0	1	0	0	0.75
R03E1.2	WBGene00010993	1	1	0	0	0	0	0	0.75
Y57G11C.8	WBGene00013306	1	1	0	0	0	0	0	0.75
ced-3	WBGene00000417	1	0	0	0	0	1	0	0.73
rop-1	WBGene00004405	1	0	0	0	1	0	0	0.73
F31E8.4	WBGene00017954	1	0	0	0	1	0	0	0.73
T12G3.1	WBGene00011737	1	0	0	0	1	0	0	0.73
lgc-50	WBGene00020605	1	0	0	1	0	0	0	0.71
mlc-1	WBGene00003369	1	0	0	0	0	1	0	0.71
pfn-2	WBGene00003990	1	0	0	0	0	1	0	0.71
ptr-24	WBGene00004238	1	0	0	0	0	1	0	0.71
unc-11	WBGene00006751	1	0	0	0	0	1	0	0.71
C18A3.5	WBGene00015943	1	0	0	0	0	1	0	0.71
vha-16	WBGene00016258	1	0	0	0	0	1	0	0.71
F49C12.11	WBGene00009880	1	0	0	0	0	1	0	0.71
F52D10.6	WBGene00009932	1	0	0	0	0	1	0	0.71
F52G3.1	WBGene00018710	1	0	0	0	0	1	0	0.71
T02G5.7	WBGene00020166	1	0	0	0	0	1	0	0.71
T10E9.3	WBGene00020413	1	0	0	0	0	1	0	0.71
mex-3	WBGene00003229	1	0	0	0	0	1	0	0.71
nex-1	WBGene00003588	1	0	0	0	0	1	0	0.71
R11G10.4	WBGene00050968	1	0	0	0	0	1	0	0.71
klp-4	WBGene00002217	1	0	0	0	1	0	0	0.71
B0334.6	WBGene00007146	1	0	0	0	0	1	0	0.71
T05B4.12	WBGene00020243	1	0	0	0	0	1	0	0.71
cal-4	WBGene00000288	1	0	0	0	0	1	0	0.71
tag-60	WBGene00006438	1	0	0	0	0	1	0	0.71
mom-5	WBGene00003397	1	0	0	0	0	1	0	0.71
C34D10.2	WBGene00016407	1	0	0	0	0	1	0	0.71
C48E7.1	WBGene00016749	1	0	0	0	0	1	0	0.71
F40F11.2	WBGene00009587	1	0	0	0	0	1	0	0.71
T10H10.2	WBGene00020426	1	0	0	0	0	1	0	0.71
ZK632.10	WBGene00014017	1	0	0	0	0	1	0	0.71
cal-1	WBGene00000285	1	0	0	0	0	1	0	0.71
cdh-9	WBGene00000401	1	0	0	0	0	1	0	0.71
cht-1	WBGene00000503	1	0	0	0	0	1	0	0.71
clc-2	WBGene00000523	1	0	0	0	0	1	0	0.71
cutl-24	WBGene00021396	1	0	0	0	0	1	0	0.71
eat-6	WBGene00001137	1	0	0	0	0	1	0	0.71
fkh-2	WBGene00001434	1	0	0	0	0	1	0	0.71
grl-4	WBGene00001713	1	0	0	0	0	1	0	0.71
ifa-4	WBGene00002052	1	0	0	0	0	1	0	0.71
ntl-4	WBGene00003827	1	0	0	0	0	1	0	0.71
ooc-5	WBGene00003870	1	0	0	0	0	1	0	0.71
patr-1	WBGene00009661	1	0	0	0	0	1	0	0.71
phat-4	WBGene00020237	1	0	0	0	0	1	0	0.71
phb-2	WBGene00004015	1	0	0	0	0	1	0	0.71
sup-17	WBGene00006324	1	0	0	0	0	1	0	0.71
vha-2	WBGene00006911	1	0	0	0	0	1	0	0.71
C04F12.8	WBGene00007302	1	0	0	0	0	1	0	0.71
C07A12.7	WBGene00015561	1	0	0	0	0	1	0	0.71
C09D4.1	WBGene00015632	1	0	0	0	0	1	0	0.71
C35C5.3	WBGene00007955	1	0	0	0	0	1	0	0.71
F10D7.2	WBGene00017339	1	0	0	0	0	1	0	0.71
F43C9.2	WBGene00018376	1	0	0	0	0	1	0	0.71
F47F2.1	WBGene00018569	1	0	0	0	0	1	0	0.71
K10D3.4	WBGene00010738	1	0	0	0	0	1	0	0.71
T06F4.1	WBGene00020294	1	0	0	0	0	1	0	0.71
T09A12.5	WBGene00020374	1	0	0	0	0	1	0	0.71
T19A5.3	WBGene00020554	1	0	0	0	0	1	0	0.71
ZK816.1	WBGene00022825	1	0	0	0	0	1	0	0.71
chn-1	WBGene00000500	1	0	1	0	0	0	0	0.71
gly-13	WBGene00001638	1	0	0	0	0	1	0	0.71
sek-1	WBGene00004758	1	0	0	0	0	1	0	0.71
K08E7.6	WBGene00010674	1	0	0	0	0	1	0	0.71
gcs-1	WBGene00001527	1	0	0	0	0	1	0	0.71
lst-1	WBGene00003083	1	0	0	0	0	1	0	0.71
B0280.3	WBGene00015101	1	0	0	0	0	1	0	0.71
Transketolase	WBGene00012713	1	0	0	0	0	1	0	0.71
Y49G5B.1	WBGene00021732	1	0	0	0	0	1	0	0.71
ZC373.1	WBGene00013866	1	0	0	0	0	1	0	0.71
ZK1073.1	WBGene00014213	1	0	0	0	0	1	0	0.71
C06E4.2	WBGene00015531	1	0	0	0	0	1	0	0.71
R53.2	WBGene00011272	1	1	0	0	0	0	0	0.71
H17B01.4	WBGene00019209	1	0	0	0	1	0	0	0.71
F45H11.3	WBGene00009744	1	0	0	0	0	1	0	0.71
ZK652.8	WBGene00022786	1	0	0	0	0	1	0	0.71
C48B4.3	WBGene00008168	1	0	0	0	0	1	0	0.71
frm-4	WBGene00001491	1	0	0	0	0	1	0	0.71
C33A11.1	WBGene00007877	1	0	0	0	0	1	0	0.71
D2092.6	WBGene00017067	1	0	0	0	0	1	0	0.71
arx-7	WBGene00000205	1	0	0	0	0	1	0	0.71
kin-20	WBGene00002203	1	0	0	0	0	1	0	0.71
tag-253	WBGene00016500	1	0	0	0	0	1	0	0.71
C24A3.2	WBGene00016033	1	0	0	0	0	1	0	0.71
C30G7.2	WBGene00044176	1	0	0	0	0	1	0	0.71
F09G8.7	WBGene00017321	1	0	0	0	0	1	0	0.71
F40E10.5	WBGene00009573	1	0	0	0	0	1	0	0.71
F58D5.5	WBGene00010244	1	0	0	0	0	1	0	0.71
F59C12.3	WBGene00019102	1	0	0	0	0	1	0	0.71
H27A22.1	WBGene00010418	1	0	0	0	0	1	0	0.71
R148.5	WBGene00020104	1	0	0	0	0	1	0	0.71
Y17G7B.20	WBGene00012471	1	0	0	0	0	1	0	0.71
Y70D2A.1	WBGene00013496	1	0	0	0	0	1	0	0.71
Y71H10B.1	WBGene00022201	1	0	0	0	0	1	0	0.71
ZK616.6	WBGene00022776	1	0	0	0	0	1	0	0.71
ZK863.8	WBGene00014125	1	0	0	0	0	1	0	0.71
ZK970.1	WBGene00014171	1	0	0	0	0	1	0	0.71
Y62E10A.2	WBGene00013373	1	0	0	0	1	0	0	0.71
Y34D9A.2	WBGene00021328	1	0	0	0	1	0	0	0.71
F58G1.7	WBGene00010269	1	0	0	0	0	1	0	0.71
C05D2.10	WBGene00015470	1	1	0	0	0	0	0	0.7
Y12A6A.2	WBGene00012440	1	0	0	0	1	0	0	0.7
cky-1	WBGene00000521	1	0	0	0	1	0	0	0.7
C52B9.4	WBGene00016867	1	0	0	0	1	0	0	0.7
ttyh-1	WBGene00009632	1	0	0	0	0	1	0	0.7
C28H8.1	WBGene00016192	1	0	0	0	0	1	0	0.7
F17C11.4	WBGene00008915	1	0	0	0	0	1	0	0.7
F30A10.3	WBGene00009262	1	0	0	0	0	1	0	0.7
F49E2.5	WBGene00009888	1	0	0	0	0	1	0	0.7
F38E9.1	WBGene00018184	2	1	0	1	0	0	0	0.7
K02E10.7	WBGene00019321	1	1	0	0	0	0	0	0.7
Y59E9AL.4	WBGene00021994	1	1	0	0	0	0	0	0.7
ace-3	WBGene00000037	1	0	0	0	1	0	0	0.7
pptr-2	WBGene00007554	1	0	0	0	1	0	0	0.7
dhs-17	WBGene00000980	1	0	0	0	1	0	0	0.7
lir-3	WBGene00003046	1	0	0	0	1	0	0	0.7
mec-8	WBGene00003172	1	0	0	0	1	0	0	0.7
ncs-2	WBGene00003564	1	0	0	0	1	0	0	0.7
phat-5	WBGene00020242	1	0	0	0	1	0	0	0.7
tag-81	WBGene00006454	1	0	0	0	1	0	0	0.7
tth-1	WBGene00006649	1	0	0	0	1	0	0	0.7
C10G11.7	WBGene00015687	1	0	0	0	1	0	0	0.7
C48E7.11	WBGene00016754	1	0	0	0	1	0	0	0.7
H14A12.3	WBGene00019196	1	0	0	0	1	0	0	0.7
C11D2.4	WBGene00015702	1	1	0	0	0	0	0	0.68
egl-46	WBGene00001210	1	1	0	0	0	0	0	0.66
F26A1.1	WBGene00017801	1	0	1	0	0	0	0	0.66
tag-277	WBGene00044324	1	0	1	0	0	0	0	0.63
mxl-3	WBGene00003511	1	1	0	0	0	0	0	0.63
nac-3	WBGene00003519	1	0	1	0	0	0	0	0.62
F35H12.6	WBGene00018078	1	1	0	0	0	0	0	0.61
T23B7.3	WBGene00044767	1	1	0	0	0	0	0	0.61
F09E5.8	WBGene00017286	1	1	0	0	0	0	0	0.61
T09A5.8	WBGene00011636	1	1	0	0	0	0	0	0.61
T18D3.9	WBGene00011826	1	1	0	0	0	0	0	0.61
aps-3	WBGene00000165	1	1	0	0	0	0	0	0.6
cogc-5	WBGene00016601	1	1	0	0	0	0	0	0.6
ccdc-47	WBGene00014204	1	0	1	0	0	0	0	0.59
lgc-47	WBGene00009799	1	1	0	0	0	0	0	0.59
dkf-2	WBGene00012019	1	0	1	0	0	0	0	0.57
tbc-6	WBGene00015410	1	0	1	0	0	0	0	0.57
F37B12.3	WBGene00009505	1	0	1	0	0	0	0	0.57
W02D9.10	WBGene00012216	1	0	0	0	1	0	0	0.57
alh-9	WBGene00000115	1	0	0	0	1	0	0	0.56
lact-3	WBGene00010897	1	0	0	0	1	0	0	0.56
K03H1.7	WBGene00010542	1	0	0	0	1	0	0	0.56
gly-3	WBGene00001628	1	0	0	0	1	0	0	0.56
rbc-2	WBGene00004314	1	0	1	0	0	0	0	0.56
nhr-1	WBGene00003600	1	0	0	0	1	0	0	0.52
scl-3	WBGene00009896	1	0	0	0	1	0	0	0.52
tsp-1	WBGene00006627	1	0	0	0	1	0	0	0.52
Y71F9B.8	WBGene00022129	1	0	0	0	1	0	0	0.52
lin-59	WBGene00003040	1	1	0	0	0	0	0	0.52
sax-2	WBGene00004728	1	1	0	0	0	0	0	0.52
D2045.7	WBGene00008424	1	1	0	0	0	0	0	0.52
T24G10.2	WBGene00020779	1	0	0	0	1	0	0	0.52
F13B12.6	WBGene00008733	1	0	0	0	1	0	0	0.52
aakb-1	WBGene00010115	1	0	0	0	1	0	0	0.52
gon-2	WBGene00001651	1	0	0	0	1	0	0	0.52
ser-4	WBGene00004779	1	0	0	0	1	0	0	0.52
C33C12.10	WBGene00016342	1	0	0	0	1	0	0	0.52
PHD-finger	WBGene00007524	1	1	0	0	0	0	0	0.52
pqn-63	WBGene00004146	1	0	0	0	1	0	0	0.5
cuticlin	WBGene00009982	1	0	0	0	1	0	0	0.5
F13H8.5	WBGene00017438	1	0	0	0	1	0	0	0.5
T01B6.3	WBGene00020135	1	0	0	0	1	0	0	0.5
Y32F6B.1	WBGene00012531	1	0	0	0	1	0	0	0.5
alh-4	WBGene00000110	1	0	0	0	1	0	0	0.48
F38E11.5	WBGene00009542	1	0	0	0	1	0	0	0.48
SR-famC	WBGene00015926	1	0	0	0	1	0	0	0.48
Y69H2.3	WBGene00013481	1	1	0	0	0	0	0	0.46
smk-1	WBGene00018285	1	0	0	0	1	0	0	0.46
ZC449.7	WBGene00045365	1	0	0	0	1	0	0	0.46
T05B4.9	WBGene00020240	1	0	0	0	1	0	0	0.46
AH9.1	WBGene00014998	1	1	0	0	0	0	0	0.44
R09F10.5	WBGene00019988	1	1	0	0	0	0	0	0.44
nhr-23	WBGene00003622	1	0	0	0	1	0	0	0.44
ric-4	WBGene00004364	1	0	0	0	1	0	0	0.44
mrp-6	WBGene00003412	1	0	0	0	1	0	0	0.44
egl-27	WBGene00001194	1	0	0	0	1	0	0	0.42
C56C10.10	WBGene00016966	1	1	0	0	0	0	0	0.31
F55F3.3	WBGene00010117	1	1	0	0	0	0	0	0.31
T21B6.2	WBGene00011879	1	1	0	0	0	0	0	0.31
unc-18	WBGene00006757	1	0	1	0	0	0	0	0.29
gale-1	WBGene00008132	1	0	1	0	0	0	0	0.29
flp-25	WBGene00010575	1	1	0	0	0	0	0	0.14
lpr-4	WBGene00012257	1	1	0	0	0	0	0	0.14
dpy-23	WBGene00001082	1	1	0	0	0	0	0	0.13
F29C12.3	WBGene00009245	1	1	0	0	0	0	0	< 0.1
sad-1	WBGene00004719	1	1	0	0	0	0	0	< 0.1
C01G5.5	WBGene00015307	1	1	0	0	0	0	0	< 0.1
ceh-38	WBGene00000459	1	0	1	0	0	0	0	< 0.1
C37A5.11	WBGene00077520	1	0	1	0	0	0	0	< 0.1
C50F4.16	WBGene00008238	1	0	1	0	0	0	0	< 0.1
Y106G6E.4	WBGene00013708	1	0	1	0	0	0	0	< 0.1
age-1	WBGene00000090	1	0	0	1	0	0	0	< 0.1
exc-9	WBGene00017644	1	0	0	1	0	0	0	< 0.1
lpr-3	WBGene00012261	1	0	0	1	0	0	0	< 0.1
nhr-48	WBGene00003638	1	0	0	1	0	0	0	< 0.1
stn-1	WBGene00006062	1	0	0	1	0	0	0	< 0.1
C09F5.1	WBGene00015647	1	0	0	1	0	0	0	< 0.1
C10C6.6	WBGene00007514	1	0	0	1	0	0	0	< 0.1
CC8.1	WBGene00016986	1	0	0	1	0	0	0	< 0.1
F22H10.6	WBGene00017730	1	0	0	1	0	0	0	< 0.1
F33D11.9	WBGene00018006	1	0	0	1	0	0	0	< 0.1
Y48E1B.14	WBGene00013011	1	0	0	1	0	0	0	< 0.1
