# Supplementary material for: Interferon-β-induced miR-1 alleviates toxic protein accumulation by controlling autophagy
Source: eLife. 2019 Dec 4;8:e49930. doi: 10.7554/eLife.49930 (PMC6914338; doi:10.7554/eLife.49930)
Supplement: Supplementary file 2. — Differentially expressed genes in mir-1(gk276) animals compared to wild-type for each of the three biological replicate samples. Raw counts and counts per million reads (CPM) are shown. The false discovery cut-off was set at 0.1 and absolute log fold change set to 0.3 (1.2x change in expression). Full dataset is located at NCBI - GSE128968. [file elife-49930-supp2.xls]

## Sheet: Supplementary File 2
Gene.ID	Gene.Name	Biotype	LFC_mir1_over_N2	FDR	AveExpr	P value	N2_1_S1	N2_2_S2	N2_3_S3	mir-1_1_S7	mir-1_2_S8	mir-1_3_S9	N2_1_S1 CPM	N2_2_S2 CPM	N2_3_S3 CPM	mir-1_1_S7 CPM	mir-1_2_S8 CPM	mir-1_3_S9 CPM
WBGene00004910	snf-11	protein_coding	1.70202	0.000961572	4.82818	6.05e-08	260	331	370	1096	1205	955	14.1	16.76	17.844	51.636	47.089	50.934
WBGene00007425	C08B6.4	protein_coding	2.16953	0.000974869	3.65307	1.76e-07	87	146	133	538	707	467	4.718	7.393	6.414	25.347	27.628	24.907
WBGene00009221	acs-2	protein_coding	-2.22691	0.000974869	4.985	1.84e-07	1547	1194	1448	267	448	241	83.896	60.457	69.835	12.579	17.507	12.854
WBGene00012383	ttr-17	protein_coding	-1.02453	0.00717062	4.95581	1.81e-06	909	853	922	484	534	370	49.297	43.191	44.467	22.803	20.868	19.734
WBGene00007250	nspb-8	protein_coding	-2.01177	0.00912115	1.94532	4.02e-06	166	152	150	54	39	30	9.002	7.696	7.234	2.544	1.524	1.6
WBGene00018424	F44E7.2	protein_coding	-0.979151	0.00912115	5.88099	3.5e-06	1443	1737	1866	880	1133	689	78.256	87.951	89.994	41.459	44.275	36.747
WBGene00014955	Y102A5C.6	pseudogene	1.61655	0.00912115	4.37542	3.86e-06	203	322	208	693	923	701	11.009	16.304	10.031	32.649	36.069	37.387
WBGene00015894	acdh-2	protein_coding	-1.31355	0.0118578	5.68515	6.54e-06	1894	1321	1760	686	826	570	102.715	66.888	84.882	32.319	32.278	30.401
WBGene00016274	C30G12.2	protein_coding	-0.870589	0.0118578	7.66954	6.72e-06	4658	5585	6606	3266	3779	2580	252.611	282.791	318.597	153.87	147.675	137.603
WBGene00050914	T12B5.15	protein_coding	-1.31479	0.0147153	2.79366	9.26e-06	238	207	218	103	102	74	12.907	10.481	10.514	4.853	3.986	3.947
WBGene00022633	ZC581.3	protein_coding	-1.04735	0.0193013	3.99725	1.58e-05	495	406	496	232	283	193	26.845	20.557	23.921	10.93	11.059	10.294
WBGene00010348	H01G02.1	protein_coding	-1.18474	0.0193013	3.61232	1.46e-05	390	319	413	194	182	140	21.15	16.152	19.918	9.14	7.112	7.467
WBGene00016423	tag-275	protein_coding	1.35611	0.0193013	2.95262	1.54e-05	71	111	115	257	291	239	3.85	5.62	5.546	12.108	11.372	12.747
WBGene00010196	F57C2.4	protein_coding	-1.91664	0.0196099	1.24571	1.86e-05	105	92	82	24	29	23	5.694	4.658	3.955	1.131	1.133	1.227
WBGene00050913	T12B5.14	protein_coding	-1.12422	0.0196099	2.86863	1.98e-05	197	239	219	98	133	85	10.684	12.102	10.562	4.617	5.197	4.533
WBGene00010065	F54F7.3	protein_coding	-1.29626	0.0196099	3.90766	1.76e-05	461	456	516	263	238	128	25.001	23.089	24.886	12.391	9.301	6.827
WBGene00016180	C28C12.4	protein_coding	1.58558	0.0205315	3.62099	2.33e-05	130	211	107	485	516	358	7.05	10.684	5.16	22.85	20.164	19.094
WBGene00014954	Y102A5C.5	pseudogene	1.49649	0.0205315	3.25019	2.3e-05	92	156	102	306	378	331	4.989	7.899	4.919	14.417	14.771	17.654
WBGene00010790	sodh-1	protein_coding	-1.21332	0.0213268	4.45599	2.55e-05	727	751	566	350	343	230	39.426	38.026	27.297	16.489	13.404	12.267
WBGene00013986	ZK512.7	protein_coding	-1.18038	0.0237858	5.21294	2.99e-05	1242	963	1197	661	515	409	67.356	48.761	57.729	31.142	20.125	21.814
WBGene00009130	F25H5.8	protein_coding	-0.874214	0.0239979	4.25002	5.31e-05	529	466	574	316	368	220	28.689	23.595	27.683	14.888	14.381	11.734
WBGene00006062	stn-1	protein_coding	0.775085	0.0239979	4.67524	5.44e-05	328	409	453	721	779	623	17.788	20.709	21.847	33.968	30.442	33.227
WBGene00021055	W06A11.4	protein_coding	-1.11488	0.0239979	2.1824	4.01e-05	127	134	142	61	76	58	6.887	6.785	6.848	2.874	2.97	3.093
WBGene00007243	nspb-7	protein_coding	-1.90962	0.0239979	1.28427	5.04e-05	99	72	120	24	33	22	5.369	3.646	5.787	1.131	1.29	1.173
WBGene00022497	Y119D3B.21	protein_coding	-0.550001	0.0239979	6.72234	3.93e-05	2431	2557	2762	1881	2154	1530	131.837	129.471	133.207	88.619	84.174	81.602
WBGene00008040	ttr-5	protein_coding	-0.898743	0.0239979	3.37735	6.75e-05	268	293	297	189	164	132	14.534	14.836	14.324	8.904	6.409	7.04
WBGene00011269	R17.3	protein_coding	-1.08795	0.0239979	3.92519	6.93e-05	451	366	542	198	287	184	24.458	18.532	26.14	9.328	11.215	9.814
WBGene00022072	cpg-9	protein_coding	-0.662805	0.0239979	5.82534	7.08e-05	1218	1589	1542	944	1124	805	66.054	80.457	74.368	44.474	43.924	42.934
WBGene00016434	C35B1.4	protein_coding	-0.744153	0.0239979	4.43599	7.1e-05	555	541	604	398	406	268	30.099	27.393	29.13	18.751	15.866	14.294
WBGene00019164	H06H21.8	protein_coding	-0.565747	0.0239979	6.03921	6.9e-05	1462	1635	1763	1217	1304	928	79.287	82.787	85.027	57.336	50.958	49.494
WBGene00007508	C10C5.4	protein_coding	-1.02109	0.0239979	5.48842	6.09e-05	1486	1031	1408	653	801	556	80.588	52.204	67.906	30.765	31.301	29.654
WBGene00001390	far-6	protein_coding	-0.587722	0.0239979	5.76496	6.51e-05	1264	1376	1398	989	1018	810	68.549	69.672	67.423	46.595	39.781	43.201
WBGene00007458	C08F11.11	protein_coding	-0.91967	0.0239979	6.70158	5.91e-05	3251	2490	2991	1877	1790	1200	176.307	126.079	144.251	88.431	69.949	64.001
WBGene00015043	cyp-34A8	protein_coding	-0.821064	0.0239979	3.86495	5.38e-05	391	376	403	241	244	209	21.205	19.038	19.436	11.354	9.535	11.147
WBGene00016892	C53A3.2	protein_coding	-0.858597	0.0239979	6.08814	3.86e-05	1749	1701	2140	1178	1347	753	94.851	86.128	103.209	55.499	52.638	40.161
WBGene00044553	T23B12.11	protein_coding	-1.01773	0.0239979	3.54396	3.82e-05	346	308	355	203	199	125	18.764	15.595	17.121	9.564	7.777	6.667
WBGene00008244	fipr-11	protein_coding	-2.67037	0.0239979	-0.24677	5e-05	50	37	41	5	8	7	2.712	1.873	1.977	0.236	0.313	0.373
WBGene00002263	lea-1	protein_coding	0.645103	0.0239979	8.25353	5.71e-05	4690	4830	5283	7326	9705	7298	254.346	244.562	254.79	345.148	379.251	389.235
WBGene00044081	D1086.11	protein_coding	-1.15288	0.0239979	5.83907	5.96e-05	2131	1463	1653	953	925	594	115.568	74.078	79.721	44.899	36.147	31.681
WBGene00000025	abu-2	protein_coding	-3.99757	0.0239979	-1.33179	4.44e-05	32	24	40	1	2	2	1.735	1.215	1.929	0.047	0.078	0.107
WBGene00004145	pqn-62	protein_coding	0.863722	0.0239979	4.59605	3.44e-05	294	371	432	684	818	580	15.944	18.785	20.835	32.225	31.966	30.934
WBGene00009645	F42G10.1	protein_coding	-0.739241	0.0239979	4.95376	6.41e-05	710	808	917	572	539	418	38.504	40.912	44.225	26.949	21.063	22.294
WBGene00009624	cnc-8	protein_coding	-0.85903	0.0239979	3.7537	5.73e-05	376	354	368	231	220	184	20.391	17.924	17.748	10.883	8.597	9.814
WBGene00007750	syg-2	protein_coding	1.03925	0.0239979	4.46099	4.98e-05	223	354	374	680	764	568	12.094	17.924	18.037	32.037	29.856	30.294
WBGene00011680	T10B10.3	protein_coding	0.912645	0.0239979	4.74764	5.02e-05	417	401	370	699	1010	658	22.615	20.304	17.844	32.932	39.469	35.094
WBGene00010007	F53H4.2	protein_coding	-1.03383	0.0239979	5.12635	5.01e-05	1170	950	934	562	644	370	63.451	48.102	45.045	26.477	25.166	19.734
WBGene00044773	C08A9.10	protein_coding	-1.50256	0.0239979	2.89747	5.89e-05	307	210	249	118	86	79	16.649	10.633	12.009	5.559	3.361	4.213
WBGene00012382	ttr-16	protein_coding	-0.51285	0.0241393	8.0362	7.45e-05	5804	6294	6949	4675	5403	3922	314.76	318.691	335.139	220.252	211.138	209.178
WBGene00007753	C27A7.1	protein_coding	-0.580499	0.0241393	5.39305	7.37e-05	961	1033	1122	749	817	619	52.117	52.305	54.112	35.287	31.927	33.014
WBGene00045271	F07G6.10	protein_coding	-1.21674	0.0256907	3.4436	8.09e-05	367	296	346	204	149	110	19.903	14.988	16.687	9.611	5.823	5.867
WBGene00016627	C44B7.5	protein_coding	-1.51563	0.026174	4.53299	8.67e-05	1018	722	681	405	310	187	55.208	36.558	32.844	19.081	12.114	9.974
WBGene00001119	dyf-3	protein_coding	0.974181	0.026174	2.61013	8.73e-05	82	98	83	188	196	158	4.447	4.962	4.003	8.857	7.659	8.427
WBGene00008394	D1086.7	protein_coding	-1.07697	0.026174	4.36797	8.58e-05	715	511	608	353	313	241	38.776	25.874	29.323	16.631	12.231	12.854
WBGene00006331	sup-26	protein_coding	0.663057	0.0264716	6.07034	9e-05	946	1229	1076	1711	2117	1559	51.303	62.229	51.894	80.61	82.728	83.149
WBGene00017160	F01F1.3	protein_coding	-1.08646	0.027288	2.33779	0.000100427	148	136	159	72	74	73	8.026	6.886	7.668	3.392	2.892	3.893
WBGene00018340	anmt-2	protein_coding	-0.600086	0.027288	5.39904	9.84e-05	930	1094	1129	749	793	634	50.435	55.394	54.45	35.287	30.989	33.814
WBGene00012880	Y45F10C.4	protein_coding	-0.964097	0.027288	5.08038	9.94e-05	994	787	1118	589	614	363	53.906	39.849	53.919	27.749	23.994	19.36
WBGene00044080	D1086.10	protein_coding	-0.604719	0.027288	7.90239	0.000101359	5964	5400	6565	4452	4775	3207	323.437	273.424	316.619	209.746	186.597	171.044
WBGene00007938	C34F6.1	protein_coding	1.34802	0.027288	5.21148	9.55e-05	327	681	458	1082	1464	1226	17.734	34.482	22.089	50.976	57.21	65.388
WBGene00000027	abu-4	protein_coding	-1.98123	0.028345	1.30732	0.000107926	90	79	140	23	42	17	4.881	4	6.752	1.084	1.641	0.907
WBGene00017780	F25E2.2	protein_coding	-0.557559	0.028345	6.13745	0.000108855	1586	1665	1943	1232	1485	995	86.011	84.306	93.708	58.043	58.031	53.068
WBGene00000657	col-81	protein_coding	-0.938978	0.0285412	9.28717	0.000111405	18860	14431	19584	11804	9670	7515	1022.81	730.7	944.504	556.12	377.883	400.809
WBGene00010738	K10D3.4	protein_coding	1.24114	0.0288415	6.95369	0.000115951	1068	2223	1810	3677	4737	3722	57.919	112.559	87.293	173.234	185.112	198.511
WBGene00014088	ZK809.8	protein_coding	-0.706917	0.0288415	6.36548	0.000116209	1738	2457	2254	1487	1566	1076	94.255	124.408	108.707	70.057	61.196	57.388
WBGene00019939	lips-17	protein_coding	-0.97378	0.0307099	4.10245	0.000127556	499	421	552	307	316	174	27.062	21.317	26.622	14.464	12.349	9.28
WBGene00000503	cht-1	protein_coding	1.10729	0.0307099	3.08503	0.000127604	141	108	104	233	332	230	7.647	5.468	5.016	10.977	12.974	12.267
WBGene00007344	C05E7.2	protein_coding	-0.873112	0.0307859	6.48469	0.000129858	2633	1935	2883	1417	1711	1112	142.792	97.977	139.042	66.759	66.862	59.308
WBGene00022010	catp-7	protein_coding	0.553884	0.0310955	7.15787	0.000133121	2052	2511	2613	3589	4143	3254	111.283	127.142	126.021	169.088	161.9	173.551
WBGene00007251	nspb-9	protein_coding	-1.84348	0.031535	0.924377	0.000136988	77	54	90	26	21	16	4.176	2.734	4.341	1.225	0.821	0.853
WBGene00010759	cysl-2	protein_coding	0.597781	0.0320907	6.05346	0.000157835	948	1239	1100	1709	1983	1504	51.412	62.736	53.051	80.516	77.491	80.215
WBGene00020200	T04A6.1	protein_coding	-1.41199	0.0320907	1.5985	0.000157859	82	118	100	52	36	31	4.447	5.975	4.823	2.45	1.407	1.653
WBGene00003482	mua-3	protein_coding	0.682367	0.0320907	8.32183	0.000151682	4155	6046	5283	8723	9586	7434	225.332	306.133	254.79	410.965	374.601	396.489
WBGene00000942	deb-1	protein_coding	0.656742	0.0320907	8.00981	0.000152379	3461	4383	4696	6250	8072	6270	187.696	221.929	226.48	294.455	315.437	334.407
WBGene00018470	F45E4.5	protein_coding	-1.42589	0.0320907	2.65217	0.000156709	247	153	234	93	77	73	13.395	7.747	11.285	4.381	3.009	3.893
WBGene00017541	F17E9.4	protein_coding	-1.58111	0.0320907	3.13918	0.000155001	402	245	301	153	116	67	21.801	12.405	14.517	7.208	4.533	3.573
WBGene00016474	C36C5.5	protein_coding	-0.848922	0.0320907	4.18947	0.000146178	472	525	485	353	281	236	25.597	26.583	23.391	16.631	10.981	12.587
WBGene00006539	tbb-6	protein_coding	0.774022	0.0320907	4.0608	0.00015688	233	244	298	528	478	385	12.636	12.355	14.372	24.876	18.679	20.534
WBGene00012185	W01F3.2	protein_coding	-0.894419	0.0320907	4.13445	0.000162002	523	426	508	332	289	206	28.363	21.57	24.5	15.641	11.294	10.987
WBGene00019321	K02E10.7	protein_coding	1.03023	0.0320907	2.88744	0.000160413	78	125	114	235	233	203	4.23	6.329	5.498	11.072	9.105	10.827
WBGene00010064	F54F7.2	protein_coding	-1.4957	0.0320907	1.90495	0.000163646	150	128	104	55	42	44	8.135	6.481	5.016	2.591	1.641	2.347
WBGene00007751	C26G2.2	protein_coding	-1.11015	0.0320907	3.60438	0.000151893	443	300	353	198	185	143	24.025	15.19	17.025	9.328	7.229	7.627
WBGene00018250	F40H3.2	protein_coding	-1.74223	0.0326192	1.55644	0.000168394	126	105	94	50	26	29	6.833	5.317	4.533	2.356	1.016	1.547
WBGene00019489	K07E1.1	protein_coding	-1.09548	0.0326385	5.4519	0.000172603	1599	1085	1251	796	684	456	86.716	54.938	60.334	37.502	26.729	24.321
WBGene00021869	Y54G2A.3	protein_coding	-0.607514	0.0326385	5.13038	0.000172528	881	824	918	661	683	470	47.778	41.722	44.274	31.142	26.69	25.067
WBGene00010760	K10H10.4	protein_coding	-1.2331	0.0326969	4.70659	0.000174971	1030	665	780	458	409	242	55.859	33.672	37.618	21.578	15.983	12.907
WBGene00020330	T07H6.1	protein_coding	0.716407	0.0334156	3.46837	0.000180921	153	189	182	308	357	241	8.297	9.57	8.778	14.511	13.951	12.854
WBGene00010137	ztf-26	protein_coding	-0.983953	0.034044	2.96359	0.00020795	229	191	250	106	161	91	12.419	9.671	12.057	4.994	6.292	4.853
WBGene00001131	dys-1	protein_coding	0.595265	0.034044	7.10433	0.000216338	1914	2493	2418	3315	4433	3075	103.799	126.231	116.616	156.179	173.232	164.004
WBGene00000609	col-20	protein_coding	-1.19384	0.034044	8.93855	0.000233618	19173	12977	13516	9422	6751	5014	1039.78	657.078	651.855	443.897	263.815	267.419
WBGene00016314	C32D5.6	protein_coding	-0.768037	0.034044	3.25877	0.00018936	236	247	276	152	200	119	12.799	12.507	13.311	7.161	7.816	6.347
WBGene00002980	lgg-1	protein_coding	-0.538985	0.034044	8.28703	0.000231156	7392	7546	7876	6315	6071	4238	400.88	382.084	379.847	297.517	237.242	226.032
WBGene00003107	mab-10	protein_coding	1.0472	0.034044	5.03202	0.000216098	340	624	452	926	1082	977	18.439	31.596	21.799	43.626	42.282	52.108
WBGene00019382	K04C2.5	protein_coding	-1.29134	0.034044	1.52742	0.000201244	80	85	111	34	56	29	4.339	4.304	5.353	1.602	2.188	1.547
WBGene00010453	fozi-1	protein_coding	0.752528	0.034044	3.87096	0.000222857	200	270	217	392	478	340	10.846	13.671	10.466	18.468	18.679	18.134
WBGene00004233	ptr-19	protein_coding	0.930643	0.034044	3.25268	0.000191799	104	146	175	270	328	241	5.64	7.393	8.44	12.72	12.818	12.854
WBGene00000547	clp-7	protein_coding	0.454966	0.034044	6.37217	0.000232128	1364	1433	1492	2113	2420	1663	73.972	72.559	71.957	99.549	94.569	88.695
WBGene00021893	ndnf-1	protein_coding	-0.949888	0.034044	2.57324	0.000194569	149	170	184	80	124	72	8.081	8.608	8.874	3.769	4.846	3.84
WBGene00019152	nspb-6	protein_coding	-1.56038	0.034044	1.80285	0.000217581	147	95	122	49	36	44	7.972	4.81	5.884	2.309	1.407	2.347
WBGene00010440	ttr-51	protein_coding	-0.650097	0.034044	6.53793	0.000229316	2630	2145	2307	1606	1884	1255	142.629	108.61	111.263	75.663	73.623	66.935
WBGene00045038	F13G11.3	protein_coding	-1.19016	0.034044	4.42829	0.000213267	760	704	538	383	361	191	41.216	35.646	25.947	18.044	14.107	10.187
WBGene00011374	T02D1.8	protein_coding	-0.571815	0.034044	4.7943	0.000209018	607	709	738	513	537	399	32.919	35.9	35.593	24.169	20.985	21.28
WBGene00004053	pme-5	protein_coding	0.477712	0.034044	5.97808	0.000201451	1027	1074	1137	1576	1863	1307	55.696	54.381	54.836	74.25	72.802	69.708
WBGene00009099	F25B3.2	protein_coding	1.52179	0.034044	1.03761	0.000206574	22	18	34	71	79	70	1.193	0.911	1.64	3.345	3.087	3.733
WBGene00011536	T06E4.9	protein_coding	-0.892389	0.034044	3.75652	0.000232861	383	321	417	178	273	186	20.771	16.254	20.111	8.386	10.668	9.92
WBGene00008245	fipr-10	protein_coding	-1.74214	0.034044	1.14368	0.000218249	76	82	82	38	17	25	4.122	4.152	3.955	1.79	0.664	1.333
WBGene00004855	sma-1	protein_coding	0.517707	0.034044	7.9137	0.000204787	3830	3942	4463	5680	7430	5313	207.707	199.599	215.243	267.601	290.349	283.366
WBGene00008304	C54D10.10	protein_coding	-1.43093	0.034044	2.26175	0.000207081	209	127	150	68	63	53	11.334	6.431	7.234	3.204	2.462	2.827
WBGene00020490	tmc-1	protein_coding	0.696725	0.034044	4.10063	0.000223952	229	268	325	455	534	401	12.419	13.57	15.674	21.436	20.868	21.387
WBGene00007295	C04C11.1	protein_coding	-1.09429	0.034044	1.74921	0.000219755	98	97	102	60	52	35	5.315	4.912	4.919	2.827	2.032	1.867
WBGene00001403	fbl-1	protein_coding	-0.614618	0.0343432	5.31988	0.000237834	970	889	1148	706	752	592	52.605	45.014	55.366	33.262	29.387	31.574
WBGene00022101	Y69A2AR.32	protein_coding	0.606455	0.035087	4.48098	0.000247029	325	385	387	561	668	522	17.625	19.494	18.664	26.43	26.104	27.841
WBGene00000608	col-19	protein_coding	-1.1312	0.035087	8.79399	0.000247403	16836	10900	12714	8441	6299	4739	913.043	551.911	613.175	397.679	246.152	252.752
WBGene00022194	Y71H2B.4	protein_coding	-0.812651	0.0351741	3.53258	0.000250542	303	287	338	158	223	176	16.432	14.532	16.301	7.444	8.714	9.387
WBGene00004171	pqn-91	protein_coding	-3.10125	0.0351741	-2.01225	0.000253202	12	17	14	1	2	1	0.651	0.861	0.675	0.047	0.078	0.053
WBGene00015665	C10A4.4	protein_coding	-1.9908	0.0351741	0.0203988	0.000255901	47	37	38	7	15	10	2.549	1.873	1.833	0.33	0.586	0.533
WBGene00004831	slo-2	protein_coding	0.666018	0.0351741	5.26248	0.000256875	531	610	718	944	1327	841	28.797	30.887	34.628	44.474	51.856	44.854
WBGene00022564	ZC204.14	protein_coding	-1.00617	0.0352864	2.01445	0.000259916	96	134	119	63	71	47	5.206	6.785	5.739	2.968	2.775	2.507
WBGene00011522	srap-1	protein_coding	0.527637	0.0355369	5.76022	0.000265711	925	924	886	1349	1628	1169	50.164	46.786	42.73	63.555	63.619	62.348
WBGene00010124	F55G11.4	protein_coding	0.74077	0.0355369	5.82554	0.000266236	861	968	837	1877	1768	1102	46.693	49.014	40.367	88.431	69.09	58.775
WBGene00015687	C10G11.7	protein_coding	0.438147	0.0360496	7.50953	0.000272346	2898	3289	3313	4425	5234	3846	157.163	166.535	159.781	208.474	204.534	205.125
WBGene00006863	gyg-1	protein_coding	0.661124	0.0368068	6.95247	0.000280384	1688	1975	2354	2911	3985	3045	91.543	100.002	113.53	137.145	155.725	162.404
WBGene00018060	arrd-18	protein_coding	0.910307	0.0369665	3.24059	0.000286255	107	174	142	270	301	251	5.803	8.81	6.848	12.72	11.762	13.387
WBGene00219376	C28G1.10	protein_coding	-0.976601	0.0369665	2.77492	0.000284069	184	164	239	121	108	82	9.979	8.304	11.527	5.701	4.22	4.373
WBGene00003408	mrp-2	protein_coding	0.658509	0.03721	4.66418	0.000290483	356	427	440	644	731	645	19.306	21.621	21.22	30.341	28.566	34.401
WBGene00013078	ttr-25	protein_coding	-0.663461	0.0378255	3.68929	0.000300051	293	350	344	224	267	166	15.89	17.722	16.591	10.553	10.434	8.854
WBGene00006541	tbh-1	protein_coding	-1.7438	0.0378255	4.26642	0.000299102	1018	690	516	344	199	156	55.208	34.937	24.886	16.207	7.777	8.32
WBGene00015544	C06E8.5	protein_coding	-1.13719	0.0382476	4.81267	0.000308215	1043	650	891	479	495	263	56.564	32.912	42.971	22.567	19.344	14.027
WBGene00016893	C53B7.2	protein_coding	-0.614464	0.0382476	3.98999	0.00030723	388	377	428	276	330	215	21.042	19.089	20.642	13.003	12.896	11.467
WBGene00013819	Y116F11A.6	protein_coding	1.28324	0.0391183	1.91965	0.000317695	42	69	39	113	142	119	2.278	3.494	1.881	5.324	5.549	6.347
WBGene00006930	vit-6	protein_coding	-1.00018	0.0397314	11.3946	0.000327676	92854	73587	66435	52617	42482	28864	5035.62	3726.01	3204.05	2478.93	1660.11	1539.45
WBGene00003515	myo-3	protein_coding	0.698797	0.0397314	9.22048	0.000325837	7552	10140	11042	14180	19769	14617	409.557	513.429	532.538	668.06	772.531	779.591
WBGene00016913	lam-2	protein_coding	0.55236	0.0403447	7.75117	0.000335275	3176	3581	4076	4985	6679	4979	172.24	181.32	196.579	234.857	261.001	265.553
WBGene00021590	Y46D2A.2	protein_coding	0.630755	0.0408327	3.88999	0.000341901	204	259	261	400	440	333	11.063	13.114	12.588	18.845	17.194	17.76
WBGene00008292	C54C8.4	protein_coding	1.71549	0.0410135	0.282194	0.000348999	8	17	16	53	50	37	0.434	0.861	0.772	2.497	1.954	1.973
WBGene00011399	T03F6.3	protein_coding	-0.523788	0.0410135	5.98839	0.000355161	1522	1453	1646	1244	1296	856	82.541	73.571	79.384	58.608	50.645	45.654
WBGene00008377	D1054.10	protein_coding	-1.85694	0.0410135	5.33184	0.000356325	2352	1268	1247	769	365	313	127.553	64.204	60.141	36.23	14.263	16.694
WBGene00016995	D1005.1	protein_coding	0.591716	0.0410135	7.19368	0.000354008	2153	2780	2331	3535	4428	3462	116.761	140.763	112.42	166.544	173.037	184.644
WBGene00000754	col-181	protein_coding	-1.10747	0.0410135	9.29043	0.000347307	25110	14288	17807	10919	10007	6639	1361.76	723.459	858.802	514.425	391.053	354.088
WBGene00013011	snx-14	protein_coding	0.625744	0.0412125	5.63614	0.000360648	751	889	789	1162	1582	1198	40.728	45.014	38.052	54.745	61.821	63.895
WBGene00021543	Y43B11AR.1	protein_coding	-0.774809	0.0413041	3.2624	0.00036405	274	231	256	173	166	127	14.859	11.696	12.346	8.151	6.487	6.773
WBGene00022383	Y95B8A.2	protein_coding	-0.664934	0.0420046	5.32862	0.000382924	1104	893	1088	680	854	518	59.872	45.216	52.472	32.037	33.373	27.627
WBGene00006999	zyx-1	protein_coding	0.540706	0.0420046	7.95658	0.000377215	3595	4353	4597	5761	7651	5695	194.963	220.41	221.706	271.417	298.985	303.74
WBGene00003765	nlp-27	protein_coding	-1.29971	0.0420046	3.83175	0.00038494	531	451	382	289	163	147	28.797	22.836	18.423	13.616	6.37	7.84
WBGene00019203	ttr-47	protein_coding	-0.558439	0.0420046	5.70595	0.000386091	1139	1386	1327	1042	1021	696	61.77	70.179	63.999	49.092	39.899	37.121
WBGene00001691	grd-2	protein_coding	0.801038	0.0420046	4.96108	0.000382824	355	564	539	839	1130	683	19.252	28.558	25.995	39.528	44.158	36.427
WBGene00011462	scl-22	protein_coding	-1.84345	0.0420046	2.3178	0.000373047	276	138	179	79	45	47	14.968	6.987	8.633	3.722	1.759	2.507
WBGene00001980	hmr-1	protein_coding	0.497959	0.0422627	7.22118	0.000396445	2449	2644	2516	3454	4572	3295	132.813	133.876	121.343	162.728	178.664	175.737
WBGene00015759	C14C6.5	protein_coding	0.559239	0.0422627	5.33316	0.000393022	648	726	640	978	1238	902	35.142	36.76	30.866	46.076	48.378	48.108
WBGene00044213	Y102A5C.36	protein_coding	1.33011	0.0422627	1.74216	0.000393911	30	58	42	131	106	101	1.627	2.937	2.026	6.172	4.142	5.387
WBGene00000596	col-7	protein_coding	-1.47858	0.0424335	5.86331	0.000403391	2852	1303	2040	969	736	552	154.669	65.976	98.386	45.652	28.761	29.441
WBGene00003762	nlp-24	protein_coding	-0.629989	0.0424335	6.49319	0.000401422	2570	2094	2152	1586	1696	1317	139.375	106.028	103.787	74.721	66.276	70.242
WBGene00018969	F56D3.1	protein_coding	0.89796	0.04285	7.72003	0.000410239	2233	3918	3464	5363	7913	5249	121.099	198.384	167.063	252.666	309.223	279.953
WBGene00045308	C37H5.14	protein_coding	0.752214	0.04285	3.39205	0.000412745	143	157	192	260	365	248	7.755	7.95	9.26	12.249	14.263	13.227
WBGene00017419	F13B9.1	protein_coding	0.576559	0.0428709	7.02562	0.000415646	1794	2460	2263	3145	4163	2874	97.292	124.56	109.141	148.17	162.681	153.283
WBGene00009384	F35B12.4	protein_coding	-1.27097	0.0437312	2.54863	0.00042674	211	164	180	121	78	51	11.443	8.304	8.681	5.701	3.048	2.72
WBGene00044283	spp-22	protein_coding	-0.931754	0.0438228	2.62581	0.000430393	155	156	211	114	108	66	8.406	7.899	10.176	5.371	4.22	3.52
WBGene00016658	C45B2.1	protein_coding	-1.84245	0.0447173	4.73056	0.000441993	1484	865	820	545	239	195	80.48	43.798	39.547	25.676	9.34	10.4
WBGene00021156	Y4C6B.2	protein_coding	-1.0796	0.0452415	2.04896	0.000450022	145	113	110	66	71	44	7.864	5.722	5.305	3.109	2.775	2.347
WBGene00020509	hex-1	protein_coding	0.590242	0.0454722	6.0715	0.00045518	878	1216	1267	1857	2033	1390	47.615	61.571	61.105	87.488	79.445	74.135
WBGene00003522	nas-3	protein_coding	1.81266	0.0454848	0.0914605	0.00045817	11	13	9	40	40	46	0.597	0.658	0.434	1.885	1.563	2.453
WBGene00017218	dct-5	protein_coding	-1.12348	0.04577	4.18341	0.000463924	637	418	608	299	354	160	34.546	21.165	29.323	14.087	13.834	8.534
WBGene00009342	fasn-1	protein_coding	0.455514	0.0458718	8.98793	0.000467844	8362	9248	8681	12589	13836	11264	453.485	468.264	418.67	593.103	540.682	600.76
WBGene00016266	idhg-2	protein_coding	-0.497415	0.0459499	5.09161	0.000477319	717	846	901	627	708	496	38.884	42.836	43.454	29.54	27.667	26.454
WBGene00003590	nex-3	protein_coding	-0.588182	0.0459499	5.23093	0.00047557	900	880	1015	767	697	500	48.808	44.558	48.952	36.136	27.237	26.667
WBGene00000751	col-178	protein_coding	-1.12571	0.0459499	7.8411	0.000473093	9554	5826	5747	4103	3388	2512	518.129	294.994	277.168	193.304	132.396	133.976
WBGene00007479	C09F9.2	protein_coding	1.36606	0.0462924	5.95687	0.000483792	458	1232	834	2080	2089	2154	24.838	62.381	40.222	97.995	81.634	114.883
WBGene00015794	C15F1.1	protein_coding	-0.71485	0.0464524	5.18695	0.000491313	974	778	1107	674	691	458	52.822	39.393	53.389	31.754	27.003	24.427
WBGene00017576	cdh-8	protein_coding	0.712159	0.0464524	4.09179	0.000491296	221	296	295	410	576	411	11.985	14.988	14.227	19.316	22.509	21.92
WBGene00004920	snr-7	protein_coding	-0.450312	0.0465347	6.089	0.00051562	1573	1577	1671	1177	1475	1061	85.306	79.85	80.59	55.452	57.64	56.588
WBGene00013135	rga-2	protein_coding	0.782638	0.0465347	3.8266	0.000502544	175	217	271	350	488	353	9.491	10.988	13.07	16.489	19.07	18.827
WBGene00018249	F40H3.1	protein_coding	-0.643997	0.0465347	3.58251	0.000495891	298	273	338	215	226	168	16.161	13.823	16.301	10.129	8.832	8.96
WBGene00009394	clec-63	protein_coding	0.540968	0.0465347	10.3788	0.00051018	18378	24135	24981	32179	40179	29904	996.668	1222.05	1204.79	1516.04	1570.11	1594.91
WBGene00000399	cdh-7	protein_coding	1.58482	0.0465347	4.50391	0.000511024	156	470	246	876	745	884	8.46	23.798	11.864	41.271	29.113	47.148
WBGene00010661	tyr-2	protein_coding	-0.770895	0.0465347	7.21952	0.000499859	4700	3248	3987	2416	3103	1845	254.889	164.459	192.286	113.825	121.259	98.402
WBGene00009889	F49E11.2	protein_coding	0.794036	0.0465347	3.08777	0.000515397	103	156	136	225	290	200	5.586	7.899	6.559	10.6	11.333	10.667
WBGene00011006	ugt-47	protein_coding	-0.506338	0.0465347	6.60557	0.000514791	2202	2130	2744	1869	1957	1391	119.418	107.85	132.339	88.054	76.475	74.188
WBGene00008549	din-1	protein_coding	0.529364	0.0467813	6.56323	0.000537941	1421	1746	1616	2179	2956	2126	77.063	88.407	77.937	102.659	115.514	113.389
WBGene00021994	Y59E9AL.4	protein_coding	-0.913011	0.0467813	2.60212	0.000538167	192	142	173	87	109	84	10.412	7.19	8.344	4.099	4.259	4.48
WBGene00001132	alp-1	protein_coding	0.479148	0.0467813	8.24538	0.000536876	4451	5158	6091	7514	8785	6503	241.385	261.17	293.759	354.006	343.299	346.834
WBGene00010084	F55B11.2	protein_coding	-1.18678	0.0467813	5.11313	0.000532433	1469	799	1005	593	521	361	79.666	40.457	48.47	27.938	20.36	19.254
WBGene00000710	col-137	protein_coding	-1.01197	0.0467813	6.13831	0.000541914	2508	1425	2312	1028	1289	856	136.013	72.153	111.504	48.432	50.371	45.654
WBGene00005832	srw-85	protein_coding	0.851271	0.0467813	2.81003	0.000540458	84	121	112	207	202	188	4.555	6.127	5.402	9.752	7.894	10.027
WBGene00003534	nas-15	protein_coding	0.977351	0.0467813	5.9368	0.000526469	674	1022	989	1380	2476	1741	36.552	51.748	47.698	65.016	96.757	92.855
WBGene00016896	nep-4	protein_coding	-0.925939	0.0467813	2.44413	0.000536327	164	135	159	92	107	56	8.894	6.836	7.668	4.334	4.181	2.987
WBGene00003375	mlp-1	protein_coding	-0.465086	0.0467858	7.13625	0.000548191	3269	3073	3704	2686	3018	1974	177.283	155.598	178.638	126.545	117.937	105.282
WBGene00000696	col-122	protein_coding	-0.715009	0.0467858	9.34882	0.000553748	20106	14168	16845	11868	12180	8518	1090.38	717.383	812.407	559.135	475.969	454.303
WBGene00013366	Y60A3A.21	protein_coding	-0.665765	0.0467858	2.96167	0.000551575	175	209	210	131	147	114	9.491	10.583	10.128	6.172	5.744	6.08
WBGene00012186	mlt-11	protein_coding	1.58904	0.0467858	8.03383	0.000550899	1815	5562	2812	9453	9458	9810	98.43	281.626	135.618	445.357	369.599	523.212
WBGene00000638	col-62	protein_coding	-1.38076	0.0469305	5.91954	0.000576878	2751	1343	2079	1101	742	601	149.191	68.002	100.267	51.871	28.996	32.054
WBGene00003071	lrp-1	protein_coding	0.595111	0.0469305	7.63758	0.000559791	2710	3534	3652	5069	6915	3908	146.968	178.941	176.13	238.815	270.224	208.431
WBGene00017750	F23F1.10	protein_coding	-0.806056	0.0469305	2.80789	0.000570323	211	173	178	115	125	95	11.443	8.76	8.585	5.418	4.885	5.067
WBGene00003096	lys-7	protein_coding	0.704902	0.0469305	6.53855	0.000569505	1736	1326	1386	2654	3151	1857	94.146	67.141	66.845	125.037	123.134	99.042
WBGene00006060	sth-1	protein_coding	-0.655206	0.0469305	4.56796	0.000569861	581	558	669	346	521	348	31.509	28.254	32.265	16.301	20.36	18.56
WBGene00022417	Y102A11A.7	protein_coding	-0.69956	0.0469305	3.22764	0.000564	234	229	258	139	181	147	12.69	11.595	12.443	6.549	7.073	7.84
WBGene00006926	vit-2	protein_coding	-1.01017	0.0469305	11.1743	0.000576412	79037	63573	57733	48034	35123	23932	4286.3	3218.96	2784.37	2263.02	1372.53	1276.4
WBGene00018031	F35B3.4	protein_coding	-0.832959	0.0469305	5.87836	0.000579098	1831	1229	1782	988	1171	685	99.298	62.229	85.943	46.547	45.76	36.534
WBGene00044404	F36H2.5	protein_coding	0.821175	0.0474839	3.57667	0.000595528	131	220	204	326	408	280	7.104	11.139	9.839	15.359	15.944	14.934
WBGene00017937	F30H5.3	protein_coding	1.16218	0.0474839	7.78877	0.000596342	2056	3888	3323	5114	9872	6700	111.5	196.865	160.263	240.935	385.777	357.341
WBGene00007372	C06B8.7	protein_coding	0.562096	0.0474839	5.17442	0.000597884	509	620	682	860	1147	800	27.604	31.393	32.892	40.517	44.822	42.668
WBGene00020218	T04G9.7	protein_coding	-1.14505	0.0474839	3.63513	0.00059774	462	362	312	245	172	127	25.055	18.33	15.047	11.543	6.721	6.773
WBGene00010183	fipr-13	protein_coding	-2.16938	0.0476535	0.698933	0.000603019	98	68	51	27	15	9	5.315	3.443	2.46	1.272	0.586	0.48
WBGene00013297	Y57G11B.5	protein_coding	-1.76901	0.0476745	4.33058	0.000609287	1114	746	517	383	221	139	60.414	37.773	24.934	18.044	8.636	7.413
WBGene00006584	tni-1	protein_coding	0.731763	0.0476745	7.74818	0.000608312	2423	3846	4100	6198	6589	4864	131.403	194.738	197.736	292.005	257.484	259.419
WBGene00021480	Y39H10A.4	protein_coding	1.03114	0.047744	1.53187	0.000613181	33	37	53	86	98	78	1.79	1.873	2.556	4.052	3.83	4.16
WBGene00010985	R03A10.5	protein_coding	-0.595381	0.0477532	4.36671	0.000616306	511	454	579	358	431	284	27.712	22.988	27.924	16.866	16.843	15.147
WBGene00009294	F31D4.9	protein_coding	-0.444997	0.0477857	5.93256	0.000621606	1391	1521	1408	1108	1296	931	75.436	77.014	67.906	52.201	50.645	49.654
WBGene00000757	col-184	protein_coding	-1.083	0.0477857	8.61278	0.000622742	16414	8462	10959	6404	6377	4451	890.158	428.465	528.535	301.71	249.2	237.392
WBGene00018572	lin-42	protein_coding	0.933114	0.0482328	7.44711	0.000632335	1895	3470	2519	4285	6513	4693	102.769	175.7	121.487	201.878	254.514	250.299
WBGene00006741	unc-1	protein_coding	0.556969	0.0482328	4.52268	0.000634642	339	375	438	653	639	485	18.385	18.988	21.124	30.765	24.971	25.867
WBGene00018921	sago-2	protein_coding	0.748249	0.0482844	3.84166	0.00064376	165	245	272	416	439	329	8.948	12.405	13.118	19.599	17.155	17.547
WBGene00002257	lbp-5	protein_coding	-0.550178	0.0482844	5.38704	0.000649762	914	1034	1134	849	839	539	49.568	52.356	54.691	39.999	32.786	28.747
WBGene00004134	pqn-47	protein_coding	0.958453	0.0482844	6.75015	0.000649656	1030	2114	1733	2991	3619	2925	55.859	107.04	83.58	140.914	141.423	156.003
WBGene00000703	col-129	protein_coding	-0.905399	0.0482844	9.55876	0.000651345	26844	16349	20624	13690	12078	9453	1455.79	827.816	994.662	644.974	471.983	504.171
WBGene00020247	T05B11.4	protein_coding	-1.22252	0.0482844	2.02347	0.000655258	151	120	111	75	65	34	8.189	6.076	5.353	3.533	2.54	1.813
WBGene00008378	D1054.11	protein_coding	-1.39426	0.0482844	6.28414	0.00065895	3566	2362	1979	1565	936	704	193.39	119.598	95.444	73.732	36.577	37.547
WBGene00005140	srd-63	protein_coding	-2.20722	0.0482844	-1.06857	0.000659639	22	18	20	5	3	5	1.193	0.911	0.965	0.236	0.117	0.267
WBGene00010368	H06A10.1	protein_coding	-1.18338	0.0482844	2.24001	0.000658615	174	118	145	90	67	46	9.436	5.975	6.993	4.24	2.618	2.453
WBGene00003374	mlk-1	protein_coding	0.583402	0.0486446	4.89219	0.000669226	398	540	543	733	902	680	21.584	27.342	26.188	34.534	35.248	36.267
WBGene00000713	col-140	protein_coding	-0.870364	0.0486446	9.39278	0.000676788	23186	16411	16238	12901	11014	8080	1257.41	830.955	783.132	607.802	430.404	430.943
WBGene00004153	pqn-71	protein_coding	-1.31344	0.0486446	0.936832	0.000674198	73	54	56	30	25	21	3.959	2.734	2.701	1.413	0.977	1.12
WBGene00015472	C05D9.3	protein_coding	-0.589279	0.0486446	5.72814	0.00067681	1123	1229	1637	885	1118	761	60.902	62.229	78.95	41.695	43.689	40.588
WBGene00011737	sqst-1	protein_coding	0.391118	0.0487535	6.22069	0.000683339	1245	1312	1391	1860	2079	1503	67.518	66.432	67.086	87.63	81.243	80.162
WBGene00006929	vit-5	protein_coding	-1.59777	0.0487535	9.12815	0.000684464	25461	20605	14454	12033	6599	3919	1380.79	1043.31	697.093	566.908	257.875	209.018
WBGene00010319	F59B10.3	protein_coding	-0.619316	0.0488199	3.58785	0.00068847	302	306	292	202	224	188	16.378	15.494	14.083	9.517	8.753	10.027
WBGene00017663	F21D12.3	protein_coding	-0.598613	0.0492672	4.09802	0.000700982	459	399	420	297	338	249	24.892	20.203	20.256	13.993	13.208	13.28
WBGene00014728	E03A3.1	pseudogene	0.796883	0.0492672	3.35709	0.000700221	140	179	152	243	342	277	7.592	9.063	7.331	11.448	13.365	14.774
WBGene00020840	T27A3.4	protein_coding	0.515202	0.0503838	7.18757	0.000726685	2390	2477	2520	3235	4496	3397	129.614	125.421	121.535	152.41	175.694	181.177
WBGene00013579	Y79H2A.2	protein_coding	-0.70934	0.0503838	3.29973	0.000728617	263	226	278	161	211	123	14.263	11.443	13.407	7.585	8.245	6.56
WBGene00016706	C46C11.3	protein_coding	0.661852	0.0503838	3.27871	0.000729239	129	165	175	245	304	228	6.996	8.355	8.44	11.543	11.88	12.16
WBGene00000749	col-176	protein_coding	1.55162	0.0503838	5.27349	0.000729556	303	834	369	1418	1230	1576	16.432	42.229	17.796	66.806	48.066	84.055
WBGene00010539	ttr-2	protein_coding	-0.598855	0.0506828	6.4764	0.000737077	2498	1954	2217	1654	1633	1309	135.471	98.939	106.922	77.925	63.814	69.815
WBGene00007149	B0334.13	protein_coding	-0.943197	0.0514276	3.70917	0.000751145	316	301	513	235	214	155	17.137	15.241	24.741	11.072	8.363	8.267
WBGene00008521	F02D8.4	protein_coding	-0.824462	0.0514696	5.78518	0.000755	1816	1147	1567	952	1003	692	98.485	58.077	75.574	44.851	39.195	36.907
WBGene00013331	Y57G11C.42	protein_coding	-0.55074	0.0515777	4.99178	0.000759833	772	703	870	570	696	424	41.867	35.596	41.959	26.854	27.198	22.614
WBGene00011000	R03G8.6	protein_coding	-0.73238	0.0517048	4.83591	0.00076496	866	618	772	471	586	364	46.965	31.292	37.232	22.19	22.9	19.414
WBGene00013392	Y62H9A.4	protein_coding	-1.75766	0.0517339	3.53236	0.000768647	639	416	300	223	111	92	34.654	21.064	14.469	10.506	4.338	4.907
WBGene00007857	C31H5.6	protein_coding	-0.503209	0.051769	4.94214	0.000786126	716	730	768	599	568	473	38.83	36.963	37.039	28.221	22.196	25.227
WBGene00010573	K04H4.2	protein_coding	0.999678	0.051769	7.46937	0.000795242	2007	2922	2760	3743	7805	5033	108.843	147.953	133.11	176.343	305.003	268.433
WBGene00015048	faah-2	protein_coding	-0.49776	0.051769	6.92495	0.000780528	2885	2544	3373	2186	2443	1870	156.458	128.813	162.674	102.989	95.467	99.736
WBGene00010673	K08E7.5	protein_coding	1.13972	0.051769	6.00506	0.000780736	529	1345	931	1911	2468	1723	28.689	68.103	44.901	90.033	96.444	91.895
WBGene00016481	C36C5.12	protein_coding	-1.01071	0.051769	1.49835	0.000783023	71	97	75	41	46	38	3.85	4.912	3.617	1.932	1.798	2.027
WBGene00008393	D1086.6	protein_coding	-1.30304	0.051769	4.38324	0.00079127	961	533	574	382	300	187	52.117	26.988	27.683	17.997	11.723	9.974
WBGene00012850	Y44A6C.1	protein_coding	-0.645765	0.051769	3.90159	0.000784545	387	349	400	236	336	198	20.988	17.671	19.291	11.119	13.13	10.56
WBGene00018710	F52G3.1	protein_coding	0.589246	0.051769	6.20644	0.000793081	1083	1420	1165	1726	2275	1769	58.733	71.9	56.186	81.317	88.902	94.349
WBGene00016596	C42D4.3	protein_coding	-0.801465	0.0525301	6.37352	0.000820163	2426	1659	2682	1506	1431	1072	131.566	84.002	129.348	70.952	55.92	57.175
WBGene00012794	Y43E12A.2	protein_coding	-0.602761	0.0525301	5.03457	0.000815871	852	696	918	576	691	438	46.205	35.241	44.274	27.137	27.003	23.361
WBGene00000021	abt-3	pseudogene	0.76106	0.0525301	2.15169	0.00082011	64	70	71	120	135	111	3.471	3.544	3.424	5.654	5.276	5.92
WBGene00016531	C39D10.3	protein_coding	-0.596885	0.0525301	3.93675	0.000813562	361	343	441	283	285	223	19.578	17.367	21.269	13.333	11.137	11.894
WBGene00003813	nrf-6	protein_coding	-0.467426	0.0527169	6.18414	0.000836209	1749	1572	1873	1423	1484	1043	94.851	79.597	90.332	67.042	57.992	55.628
WBGene00012596	nhr-234	protein_coding	1.02866	0.0527169	2.68533	0.000842767	59	126	99	202	235	152	3.2	6.38	4.775	9.517	9.183	8.107
WBGene00006769	unc-33	protein_coding	0.469224	0.0527169	5.35447	0.000854187	694	714	697	966	1198	899	37.637	36.153	33.615	45.511	46.815	47.948
WBGene00003081	lsm-7	protein_coding	-0.475035	0.0527169	5.108	0.000846511	845	779	840	646	699	516	45.826	39.444	40.512	30.435	27.315	27.521
WBGene00010960	MTCE.12	protein_coding	-0.87063	0.0527169	8.0638	0.000852951	6021	10350	6259	4327	4350	3842	326.529	524.062	301.861	203.857	169.989	204.911
WBGene00020855	hpo-36	protein_coding	0.929295	0.0527169	3.2795	0.000835075	95	187	158	275	326	252	5.152	9.469	7.62	12.956	12.739	13.44
WBGene00010408	mboa-2	protein_coding	-0.419824	0.0527169	5.98044	0.000853154	1373	1434	1630	1221	1363	910	74.46	72.609	78.612	57.525	53.263	48.534
WBGene00015623	C09B8.4	protein_coding	-0.955544	0.0527169	3.67128	0.000846531	336	299	465	204	277	123	18.222	15.14	22.426	9.611	10.825	6.56
WBGene00001068	dpy-6	protein_coding	1.70802	0.0527169	4.32822	0.000856268	125	435	201	715	696	920	6.779	22.026	9.694	33.686	27.198	49.068
WBGene00045245	ttr-34	protein_coding	-0.483954	0.0527169	5.80536	0.000849273	1355	1219	1446	1047	1212	774	73.484	61.723	69.738	49.327	47.362	41.281
WBGene00021133	tomm-22	protein_coding	-0.430267	0.0538278	6.14736	0.000880377	1573	1730	1680	1364	1374	1136	85.306	87.597	81.024	64.262	53.693	60.588
WBGene00007330	C05C10.3	protein_coding	-0.444063	0.0538278	7.94655	0.00088109	5698	5308	6483	4419	5545	3605	309.012	268.765	312.664	208.191	216.687	192.271
WBGene00022518	zfh-2	protein_coding	0.451564	0.0540391	5.75548	0.000894764	809	988	1011	1310	1517	1187	43.873	50.026	48.759	61.718	59.281	63.308
WBGene00017440	upb-1	protein_coding	-0.585579	0.0540391	6.38553	0.000908363	2149	1953	2103	1732	1422	1206	116.544	98.888	101.424	81.599	55.569	64.321
WBGene00010783	mrpl-36	protein_coding	-0.525598	0.0540391	3.82092	0.000907098	331	332	365	257	297	198	17.951	16.81	17.603	12.108	11.606	10.56
WBGene00018547	clec-78	protein_coding	0.939826	0.0540391	3.40383	0.000890714	121	154	194	245	419	287	6.562	7.798	9.356	11.543	16.374	15.307
WBGene00002012	hsp-12.3	protein_coding	-0.813556	0.0540391	2.22733	0.000899231	112	115	150	84	78	62	6.074	5.823	7.234	3.957	3.048	3.307
WBGene00011949	T23F6.1	protein_coding	-0.866154	0.0540391	3.97147	0.000897366	349	414	541	200	354	205	18.927	20.962	26.092	9.423	13.834	10.934
WBGene00001148	eat-20	protein_coding	0.701697	0.0540391	5.92887	0.000903436	763	1054	1110	1375	2080	1536	41.379	53.368	53.533	64.78	81.282	81.922
WBGene00022274	Y73E7A.8	protein_coding	1.62543	0.0543934	4.25137	0.000958836	104	430	228	704	725	698	5.64	21.773	10.996	33.167	28.331	37.227
WBGene00019074	cpd-1	protein_coding	0.642848	0.0543934	5.14886	0.000946535	436	670	639	983	999	833	23.645	33.925	30.818	46.312	39.039	44.428
WBGene00022354	Y82E9BR.22	protein_coding	-0.609715	0.0543934	3.08103	0.000922745	184	226	224	145	167	123	9.979	11.443	10.803	6.831	6.526	6.56
WBGene00018343	F42A10.7	protein_coding	-0.561199	0.0543934	4.40578	0.000955276	464	507	592	340	424	345	25.163	25.671	28.551	16.018	16.569	18.4
WBGene00011554	T07A5.1	protein_coding	-0.66906	0.0543934	3.27934	0.000946474	237	220	289	183	184	125	12.853	11.139	13.938	8.622	7.19	6.667
WBGene00011561	ttr-15	protein_coding	-0.634865	0.0543934	7.32435	0.000945222	4109	4150	3844	3421	2650	2191	222.838	210.131	185.39	161.173	103.556	116.856
WBGene00000698	col-124	protein_coding	-0.943042	0.0543934	9.67449	0.000949792	30372	18841	20915	15740	13049	9313	1647.12	953.996	1008.7	741.556	509.928	496.704
WBGene00017506	F16B4.4	protein_coding	-0.663129	0.0543934	6.20369	0.000922521	1967	1851	1800	1545	1182	1028	106.674	93.724	86.811	72.789	46.19	54.828
WBGene00011535	T06E4.8	protein_coding	-0.924044	0.0543934	3.89345	0.000941115	433	341	478	174	324	206	23.482	17.266	23.053	8.198	12.661	10.987
WBGene00010109	F55C10.5	protein_coding	-0.563722	0.0543934	3.51264	0.0009249	263	274	302	209	212	174	14.263	13.874	14.565	9.847	8.285	9.28
WBGene00008341	ttr-44	protein_coding	-0.564277	0.0543934	6.21963	0.000951767	1632	1681	2234	1196	1670	1074	88.506	85.116	107.742	56.347	65.26	57.281
WBGene00009846	F48F5.2	pseudogene	0.479714	0.0543934	5.07035	0.000958611	520	596	611	791	1049	701	28.2	30.178	29.468	37.266	40.993	37.387
WBGene00006927	vit-3	protein_coding	-1.48109	0.0543934	7.01161	0.000935578	5908	4622	3051	2559	1868	890	320.4	234.031	147.145	120.562	72.998	47.468
WBGene00004210	ptc-3	protein_coding	0.785403	0.0546835	7.92776	0.000968945	2602	4533	4451	6357	8609	5575	141.111	229.524	214.664	299.496	336.422	297.34
WBGene00021931	Y55F3AM.14	protein_coding	0.967111	0.0546835	4.20438	0.000974278	172	348	311	481	682	490	9.328	17.621	14.999	22.661	26.651	26.134
WBGene00001328	epi-1	protein_coding	0.399252	0.0546835	8.81963	0.000973528	7126	8251	8529	10488	13213	9412	386.454	417.781	411.34	494.119	516.336	501.984
WBGene00009397	clec-66	protein_coding	0.458956	0.0547502	4.91404	0.000985806	485	507	568	722	906	629	26.302	25.671	27.394	34.015	35.405	33.547
WBGene00003763	nlp-25	protein_coding	-0.928409	0.0547502	2.51982	0.000982788	164	144	176	81	134	59	8.894	7.291	8.488	3.816	5.236	3.147
WBGene00008211	C49F5.7	protein_coding	-1.64555	0.0547502	2.72699	0.000985803	353	202	186	129	67	55	19.144	10.228	8.97	6.078	2.618	2.933
WBGene00021083	W08E12.2	protein_coding	1.44723	0.0554789	3.56153	0.00100242	259	135	87	449	458	328	14.046	6.836	4.196	21.154	17.898	17.494
WBGene00018971	clec-67	protein_coding	0.683098	0.0557991	3.09349	0.00101172	128	155	125	242	241	202	6.942	7.848	6.029	11.401	9.418	10.774
WBGene00007507	C10C5.3	protein_coding	-1.35093	0.055879	4.39595	0.00102165	1068	531	559	347	305	198	57.919	26.887	26.96	16.348	11.919	10.56
WBGene00008917	F17C11.6	protein_coding	-0.644262	0.055879	2.65488	0.00102372	141	167	169	105	126	89	7.647	8.456	8.151	4.947	4.924	4.747
WBGene00007812	C29F7.3	protein_coding	-0.436273	0.055879	5.9269	0.00101716	1473	1423	1393	1156	1265	911	79.883	72.052	67.182	54.462	49.434	48.588
WBGene00006955	wrt-9	protein_coding	0.743049	0.056044	4.65077	0.00103027	293	412	496	615	893	584	15.89	20.861	23.921	28.974	34.897	31.147
WBGene00001570	gei-13	protein_coding	0.768221	0.056284	5.53041	0.00103823	492	899	820	1295	1433	1110	26.682	45.52	39.547	61.011	55.999	59.201
WBGene00019285	cbn-1	protein_coding	0.810851	0.0576	4.36972	0.00106777	219	406	349	646	642	463	11.877	20.557	16.832	30.435	25.088	24.694
WBGene00001854	hil-3	protein_coding	0.893578	0.0576	4.42048	0.00106975	207	380	400	563	738	563	11.226	19.241	19.291	26.525	28.839	30.027
WBGene00000680	col-106	protein_coding	-1.08427	0.0576031	8.4375	0.00107344	14975	7505	9417	5966	5747	3678	812.118	380.008	454.166	281.075	224.581	196.164
WBGene00001082	dpy-23	protein_coding	0.532795	0.0578243	5.78477	0.00108484	738	1038	1032	1359	1710	1172	40.023	52.558	49.772	64.026	66.823	62.508
WBGene00019617	K10C2.1	protein_coding	0.414484	0.0578243	8.6984	0.00108183	6620	7656	7570	9533	11795	9157	359.013	387.654	365.089	449.126	460.924	488.384
WBGene00000784	cpr-4	protein_coding	0.746926	0.0578374	8.78382	0.00108873	5354	9075	6678	12983	12157	11004	290.356	459.504	322.069	611.666	475.07	586.893
WBGene00000712	col-139	protein_coding	-0.862564	0.0580934	9.50374	0.0010972	25185	15071	20341	13678	11939	8926	1365.82	763.106	981.013	644.409	466.551	476.064
WBGene00006574	tin-13	protein_coding	-0.452281	0.0581826	6.06038	0.00110356	1595	1585	1544	1186	1325	1105	86.499	80.255	74.465	55.876	51.778	58.935
WBGene00008578	F08G2.7	protein_coding	0.717637	0.0581826	2.75174	0.00110622	85	117	118	206	203	143	4.61	5.924	5.691	9.705	7.933	7.627
WBGene00001414	fer-1	protein_coding	0.6528	0.0582564	5.32056	0.00111129	523	703	721	898	1361	963	28.363	35.596	34.773	42.307	53.185	51.361
WBGene00020281	T06A4.1	protein_coding	0.751497	0.0585845	4.44858	0.0011306	276	388	364	490	795	545	14.968	19.646	17.555	23.085	31.067	29.067
WBGene00007703	gbf-1	protein_coding	0.491884	0.0585845	7.85188	0.00112389	3619	4264	3944	5114	7314	5132	196.264	215.904	190.213	240.935	285.816	273.713
WBGene00016360	C33G8.2	protein_coding	-1.45043	0.0585845	1.67397	0.00113333	131	93	100	71	37	24	7.104	4.709	4.823	3.345	1.446	1.28
WBGene00008224	C50B8.1	protein_coding	-0.412421	0.0585845	5.98268	0.00112746	1471	1501	1450	1219	1356	927	79.775	76.002	69.931	57.431	52.99	49.441
WBGene00013394	Y62H9A.6	protein_coding	-2.03375	0.0585845	4.57855	0.00113599	1542	953	646	535	210	133	83.625	48.254	31.156	25.205	8.206	7.093
WBGene00018640	F49E10.2	protein_coding	0.998958	0.0587986	5.45039	0.00114384	397	794	766	1084	1738	1177	21.53	40.203	36.943	51.07	67.917	62.775
WBGene00008477	clec-17	protein_coding	1.25487	0.0589681	0.645708	0.00115518	25	20	16	57	53	42	1.356	1.013	0.772	2.685	2.071	2.24
WBGene00010041	F54C9.3	protein_coding	-0.483983	0.0589681	5.86326	0.00115828	1201	1404	1597	1064	1317	791	65.132	71.09	77.021	50.128	51.466	42.188
WBGene00013867	ZC373.2	protein_coding	-1.43447	0.0589681	3.50734	0.00115691	567	300	320	220	141	97	30.749	15.19	15.433	10.365	5.51	5.173
WBGene00016800	C50C3.2	protein_coding	0.501376	0.0596387	4.88284	0.0011752	472	533	497	682	890	665	25.597	26.988	23.969	32.131	34.779	35.467
WBGene00022816	fbn-1	protein_coding	1.66611	0.0605367	5.96009	0.00119671	405	1385	617	2346	1956	2810	21.964	70.128	29.757	110.527	76.436	149.87
WBGene00006726	ubl-5	protein_coding	-0.542124	0.0606911	4.10679	0.00120358	375	471	416	319	326	261	20.337	23.849	20.063	15.029	12.739	13.92
WBGene00015936	C17H12.11	protein_coding	-0.899516	0.0607725	1.85197	0.00120902	115	87	98	60	63	44	6.237	4.405	4.726	2.827	2.462	2.347
WBGene00011571	ttr-46	protein_coding	-0.369973	0.0611318	7.32625	0.00122002	3368	3605	4118	3047	3567	2415	182.652	182.536	198.604	143.553	139.391	128.803
WBGene00012240	W04A8.5	protein_coding	-3.60063	0.0617775	-3.06005	0.0012487	12	7	6	1	0	0	0.651	0.354	0.289	0.047	0	0
WBGene00017589	F19B10.10	protein_coding	0.482577	0.0617775	4.72779	0.00125707	399	490	471	639	756	595	21.638	24.811	22.716	30.105	29.543	31.734
WBGene00020248	T05C1.1	protein_coding	0.840473	0.0617775	2.91527	0.00127454	80	129	141	231	263	157	4.339	6.532	6.8	10.883	10.277	8.374
WBGene00012421	Y9C2UA.1	protein_coding	0.552081	0.0617775	3.50863	0.0012636	175	192	201	276	334	265	9.491	9.722	9.694	13.003	13.052	14.134
WBGene00012648	Y39A1A.9	protein_coding	1.16835	0.0617775	4.04783	0.00125906	136	365	218	491	575	510	7.375	18.481	10.514	23.132	22.47	27.201
WBGene00012791	Y43D4A.5	protein_coding	1.10354	0.0617775	5.66633	0.00123687	438	1148	675	1565	1767	1401	23.753	58.128	32.554	73.732	69.051	74.722
WBGene00044521	Y5H2A.4	protein_coding	-2.19043	0.0617775	0.664962	0.00126946	62	42	115	10	18	20	3.362	2.127	5.546	0.471	0.703	1.067
WBGene00007537	fipr-8	protein_coding	-2.32002	0.0617775	0.367487	0.00127478	65	40	68	21	5	16	3.525	2.025	3.28	0.989	0.195	0.853
WBGene00001065	dpy-3	protein_coding	1.55601	0.0617775	5.72862	0.00125629	361	1266	525	1864	1832	2079	19.578	64.103	25.32	87.818	71.591	110.882
WBGene00002039	hum-6	protein_coding	0.520637	0.0617775	6.02509	0.00127569	882	1245	1201	1560	1985	1433	47.832	63.039	57.922	73.496	77.57	76.428
WBGene00017154	ugt-57	protein_coding	1.58538	0.0617775	2.1021	0.00125891	30	98	40	160	145	169	1.627	4.962	1.929	7.538	5.666	9.014
WBGene00021084	W08E12.3	protein_coding	0.958531	0.0619598	3.40873	0.00128335	211	138	126	290	417	245	11.443	6.987	6.077	13.663	16.295	13.067
WBGene00219609	linc-7	lincRNA	-0.655112	0.0620279	4.00345	0.00128867	401	409	414	310	346	178	21.747	20.709	19.967	14.605	13.521	9.494
WBGene00007521	C11E4.7	protein_coding	-1.72249	0.0622201	0.672044	0.00129658	83	43	57	25	22	10	4.501	2.177	2.749	1.178	0.86	0.533
WBGene00009978	F53E4.1	protein_coding	-0.67314	0.062858	5.74759	0.00131383	1654	1215	1288	954	1105	676	89.699	61.52	62.118	44.946	43.181	36.054
WBGene00013406	Y63D3A.7	protein_coding	-0.425174	0.0636529	5.74242	0.00134359	1094	1385	1295	1015	1115	813	59.329	70.128	62.456	47.819	43.572	43.361
WBGene00003565	ncs-3	protein_coding	-0.666231	0.0636529	2.86417	0.00134909	170	202	183	108	149	111	9.219	10.228	8.826	5.088	5.823	5.92
WBGene00018533	F47B7.2	protein_coding	0.56993	0.0636529	6.86135	0.00135048	1472	2200	2204	2832	3626	2589	79.829	111.395	106.295	133.423	141.696	138.083
WBGene00013393	Y62H9A.5	protein_coding	-2.14587	0.0636529	4.42558	0.00134871	1448	828	647	539	163	110	78.527	41.925	31.204	25.394	6.37	5.867
WBGene00020732	T23E7.2	protein_coding	0.570533	0.0636529	8.18232	0.00133966	4202	5225	5081	6278	9106	7241	227.881	264.563	245.048	295.774	355.843	386.195
WBGene00023451	mlc-7	protein_coding	-0.445864	0.0639718	5.66233	0.00136654	1132	1110	1356	954	1121	710	61.39	56.204	65.398	44.946	43.806	37.868
WBGene00003963	pdi-2	protein_coding	0.749801	0.0639718	11.0614	0.00136627	25215	44313	33024	53353	68170	54586	1367.45	2243.75	1592.69	2513.61	2663.94	2911.32
WBGene00008926	F17H10.2	protein_coding	-0.470599	0.0639718	5.14218	0.00136933	822	761	947	662	759	499	44.578	38.533	45.672	31.189	29.66	26.614
WBGene00012199	mltn-3	protein_coding	0.862966	0.0642403	3.82558	0.00138317	158	261	230	331	559	352	8.569	13.215	11.093	15.594	21.845	18.774
WBGene00008495	F01D5.5	protein_coding	0.411899	0.0642403	5.05731	0.00138308	546	577	627	866	913	668	29.61	29.216	30.239	40.8	35.678	35.627
WBGene00012273	W05B2.7	protein_coding	-0.755574	0.0643981	3.33924	0.00139467	269	210	330	163	197	136	14.588	10.633	15.915	7.679	7.698	7.253
WBGene00000402	cdh-10	protein_coding	1.46844	0.0643981	5.61307	0.00139363	313	1128	584	1789	1639	1742	16.974	57.115	28.165	84.285	64.049	92.909
WBGene00006771	tln-1	protein_coding	0.468332	0.0645042	8.53078	0.00140247	5721	6579	6800	8127	11882	7960	310.259	333.121	327.953	382.886	464.324	424.543
WBGene00010872	M05B5.4	protein_coding	-0.561115	0.0645042	3.90888	0.00140509	323	403	384	299	297	197	17.517	20.406	18.52	14.087	11.606	10.507
WBGene00022517	ZC123.1	protein_coding	1.08569	0.0647368	6.46595	0.00145594	715	1866	1372	2746	3424	2128	38.776	94.483	66.169	129.372	133.803	113.496
WBGene00016728	C46H11.2	protein_coding	-0.638685	0.0647368	3.46416	0.00147806	240	262	338	212	195	156	13.016	13.266	16.301	9.988	7.62	8.32
WBGene00009004	pfd-6	protein_coding	-0.374287	0.0647368	6.04092	0.00147944	1392	1580	1573	1279	1348	1048	75.49	80.002	75.863	60.257	52.677	55.895
WBGene00020860	nspd-10	protein_coding	-0.456373	0.0647368	4.71397	0.00143194	621	577	666	498	531	396	33.678	29.216	32.12	23.462	20.75	21.12
WBGene00007246	nspb-10	protein_coding	-1.38661	0.0647368	1.8181	0.00146703	150	76	130	54	41	43	8.135	3.848	6.27	2.544	1.602	2.293
WBGene00013985	sec-16	protein_coding	0.457979	0.0647368	6.97445	0.0014156	2048	2386	2080	2861	3748	2787	111.066	120.813	100.315	134.79	146.464	148.643
WBGene00022079	Y69A2AR.8	pseudogene	0.486123	0.0647368	5.36824	0.00145154	629	706	785	930	1273	922	34.112	35.748	37.859	43.815	49.746	49.174
WBGene00022100	Y69A2AR.31	protein_coding	0.606843	0.0647368	3.47439	0.00147496	179	184	181	256	355	264	9.707	9.317	8.729	12.061	13.873	14.08
WBGene00002130	inx-8	protein_coding	-0.68003	0.0647368	4.61892	0.00145263	755	537	611	432	453	347	40.945	27.19	29.468	20.353	17.702	18.507
WBGene00003573	ncx-8	protein_coding	0.858109	0.0647368	1.35682	0.00147806	35	42	37	71	84	63	1.898	2.127	1.784	3.345	3.283	3.36
WBGene00016505	ttr-33	protein_coding	-0.675444	0.0647368	3.72305	0.00146972	348	330	333	281	226	166	18.873	16.709	16.06	13.239	8.832	8.854
WBGene00000219	asp-6	protein_coding	0.504099	0.0647368	10.5402	0.00144515	21808	29046	25438	35312	41807	35243	1182.68	1470.72	1226.83	1663.65	1633.73	1879.67
WBGene00077448	D1086.20	pseudogene	-1.12194	0.0647368	1.34504	0.0014466	80	67	83	37	56	21	4.339	3.392	4.003	1.743	2.188	1.12
WBGene00011668	clec-47	protein_coding	-0.486206	0.0647368	6.095	0.00142289	1639	1648	1609	1389	1228	1056	88.886	83.445	77.599	65.44	47.988	56.321
WBGene00016568	C41G11.1	protein_coding	-0.923202	0.0647368	2.72567	0.00146174	218	145	195	123	100	83	11.822	7.342	9.405	5.795	3.908	4.427
WBGene00000083	adt-2	protein_coding	0.460799	0.0647368	6.20843	0.00142062	1048	1370	1431	1768	2147	1609	56.835	69.369	69.015	83.295	83.9	85.815
WBGene00003247	mig-15	protein_coding	0.474943	0.0647368	5.7675	0.00147356	754	1027	1045	1360	1582	1151	40.891	52.001	50.399	64.073	61.821	61.388
WBGene00005018	sqt-3	protein_coding	0.954894	0.0656249	10.0131	0.00150387	9397	19346	18531	26712	37569	27683	509.614	979.566	893.72	1258.48	1468.12	1476.46
WBGene00015646	mlt-10	protein_coding	0.852934	0.0658712	8.71066	0.00151523	4151	8073	7445	10929	15462	9860	225.115	408.769	359.06	514.896	604.223	525.878
WBGene00007649	C17G1.2	protein_coding	-0.779398	0.0658712	3.3236	0.00151781	299	262	237	202	164	124	16.215	13.266	11.43	9.517	6.409	6.613
WBGene00000785	cpr-5	protein_coding	0.970665	0.0659028	8.94771	0.00152268	5246	10349	6662	12361	16100	15479	284.499	524.012	321.297	582.361	629.154	825.565
WBGene00020786	T25B2.2	protein_coding	-0.786436	0.0662741	3.66446	0.00153544	397	287	337	244	239	141	21.53	14.532	16.253	11.496	9.34	7.52
WBGene00009897	F49E12.1	protein_coding	-0.975234	0.0662981	5.60447	0.00154017	1874	1197	1179	925	843	493	101.63	60.609	56.861	43.579	32.943	26.294
WBGene00004120	pqn-32	protein_coding	0.914173	0.0668643	7.74948	0.00155761	2018	3832	4095	5556	8334	5204	109.439	194.03	197.495	261.759	325.675	277.553
WBGene00017687	ets-4	protein_coding	0.475657	0.0668643	5.79473	0.00156174	767	1063	1049	1403	1577	1186	41.596	53.824	50.592	66.099	61.626	63.255
WBGene00010888	dlc-2	protein_coding	-0.681386	0.0674174	3.23974	0.0015789	217	248	260	201	158	121	11.768	12.557	12.539	9.47	6.174	6.453
WBGene00010488	K02A11.3	protein_coding	-0.463526	0.0678009	4.31737	0.00160875	444	489	483	364	390	322	24.079	24.76	23.294	17.149	15.24	17.174
WBGene00016153	C27A2.5	protein_coding	-0.906597	0.0678009	2.07114	0.00161776	100	118	133	52	98	51	5.423	5.975	6.414	2.45	3.83	2.72
WBGene00016523	C39B5.5	protein_coding	-0.584507	0.0678009	6.17839	0.00161662	1865	1448	2131	1273	1530	988	101.142	73.318	102.775	59.975	59.789	52.694
WBGene00016027	C23H5.8	protein_coding	-0.343137	0.0678009	7.14466	0.00161455	3134	3183	3338	2684	2988	2309	169.962	161.168	160.986	126.451	116.765	123.149
WBGene00020995	W03F8.6	protein_coding	-1.24891	0.0678009	1.00848	0.00160663	73	52	63	39	24	21	3.959	2.633	3.038	1.837	0.938	1.12
WBGene00003539	nas-20	protein_coding	-1.19933	0.0678009	3.328	0.00160809	391	290	259	224	134	88	21.205	14.684	12.491	10.553	5.236	4.693
WBGene00001070	dpy-8	protein_coding	1.44657	0.0678009	6.69705	0.00159973	709	2510	1142	3550	3732	3557	38.45	127.091	55.077	167.25	145.839	189.711
WBGene00011940	T23B5.3	protein_coding	0.425759	0.0679085	5.86048	0.00162791	1015	1003	1019	1330	1763	1213	55.045	50.786	49.145	62.66	68.894	64.695
WBGene00018568	F47E1.4	protein_coding	-1.152	0.0679085	1.37807	0.00162888	101	61	76	38	38	33	5.477	3.089	3.665	1.79	1.485	1.76
WBGene00008436	DH11.2	protein_coding	-0.40544	0.0680028	6.59622	0.00163783	2124	2184	2457	1894	2192	1331	115.188	110.585	118.497	89.232	85.659	70.988
WBGene00044007	ZK1320.13	protein_coding	-0.673154	0.0680028	2.35939	0.0016397	120	138	135	82	111	67	6.508	6.987	6.511	3.863	4.338	3.573
WBGene00009500	F36H2.3	protein_coding	0.707328	0.0681273	4.85552	0.00164938	318	534	560	770	958	642	17.246	27.039	27.008	36.277	37.437	34.241
WBGene00022103	cdh-12	protein_coding	1.31957	0.0681273	7.12875	0.00165128	952	3139	1906	4638	5203	4198	51.628	158.94	91.923	218.509	203.322	223.898
WBGene00021263	Y22D7AR.10	protein_coding	-1.93557	0.0685066	-0.521251	0.00167773	37	28	20	8	10	4	2.007	1.418	0.965	0.377	0.391	0.213
WBGene00008915	F17C11.4	protein_coding	-0.578911	0.0685066	4.1886	0.00166485	501	397	457	309	363	275	27.17	20.102	22.04	14.558	14.185	14.667
WBGene00022822	ZK813.3	protein_coding	-2.06737	0.0685066	3.33445	0.00167573	611	443	272	252	75	57	33.136	22.431	13.118	11.872	2.931	3.04
WBGene00000105	alg-1	protein_coding	0.527089	0.0685066	7.02919	0.00167271	1732	2369	2579	3066	3920	2999	93.929	119.952	124.381	144.448	153.185	159.95
WBGene00011923	chhy-1	protein_coding	-0.735399	0.0687406	2.57289	0.00169212	165	131	170	108	101	83	8.948	6.633	8.199	5.088	3.947	4.427
WBGene00013980	dos-1	protein_coding	-0.582323	0.0687406	2.95264	0.00169168	172	187	216	147	150	106	9.328	9.469	10.417	6.926	5.862	5.653
WBGene00018298	F41G3.1	protein_coding	-0.845555	0.0707706	1.76716	0.00174654	82	106	88	46	65	50	4.447	5.367	4.244	2.167	2.54	2.667
WBGene00000988	dhs-25	protein_coding	-0.437376	0.0707873	6.59618	0.00175141	2354	2124	2344	1666	1986	1624	127.661	107.547	113.047	78.49	77.609	86.615
WBGene00004215	ptp-3	protein_coding	0.415402	0.0709701	6.38583	0.00176512	1364	1530	1496	1864	2510	1797	73.972	77.47	72.15	87.818	98.086	95.842
WBGene00020702	T22F7.3	protein_coding	1.18822	0.0709701	3.3018	0.00177186	83	194	139	235	417	317	4.501	9.823	6.704	11.072	16.295	16.907
WBGene00009334	F32D8.12	protein_coding	-0.467137	0.0709701	7.14014	0.00176301	3513	3045	3513	2928	2779	1979	190.516	154.181	169.426	137.946	108.597	105.549
WBGene00011642	T09B9.1	protein_coding	-1.06463	0.0709701	2.18223	0.00177381	158	108	140	84	85	38	8.569	5.468	6.752	3.957	3.322	2.027
WBGene00017360	F10E9.11	protein_coding	-0.536181	0.071379	3.84626	0.00180329	347	367	335	286	272	203	18.818	18.583	16.157	13.474	10.629	10.827
WBGene00014002	ZK593.2	protein_coding	-0.955237	0.071379	1.1022	0.00179655	49	66	67	36	39	23	2.657	3.342	3.231	1.696	1.524	1.227
WBGene00007732	spe-44	protein_coding	0.558285	0.071379	4.74329	0.00180649	365	513	468	641	778	646	19.795	25.975	22.571	30.199	30.403	34.454
WBGene00007058	dmd-6	protein_coding	0.529291	0.071379	5.14864	0.00180513	628	595	568	809	1154	770	34.057	30.127	27.394	38.114	45.096	41.068
WBGene00010957	MTCE.3	protein_coding	-0.908789	0.071379	5.70969	0.00179374	1392	1981	1093	753	858	809	75.49	100.306	52.714	35.476	33.529	43.148
WBGene00017483	lgc-22	protein_coding	0.7573	0.071691	6.83756	0.00181891	1199	2277	2046	3002	3930	2608	65.024	115.294	98.675	141.433	153.576	139.096
WBGene00015693	ugt-28	protein_coding	-0.464398	0.0719092	4.7345	0.00187707	605	600	696	482	609	367	32.81	30.38	33.567	22.708	23.798	19.574
WBGene00015689	C10G11.9	protein_coding	0.680638	0.0719092	5.27141	0.001845	599	605	640	821	1240	1077	32.485	30.634	30.866	38.68	48.457	57.441
WBGene00013969	tep-1	protein_coding	0.464564	0.0719092	7.07301	0.00187403	1930	2429	2640	3053	3982	3042	104.667	122.99	127.323	143.835	155.608	162.244
WBGene00020530	T15B12.1	protein_coding	-0.446945	0.0719092	4.9255	0.00183429	666	701	787	625	609	431	36.118	35.494	37.956	29.446	23.798	22.987
WBGene00020315	T07E3.4	protein_coding	-0.455459	0.0719092	5.98249	0.00188329	1312	1452	1757	1122	1460	894	71.152	73.521	84.737	52.861	57.054	47.681
WBGene00004918	snr-5	protein_coding	-0.357218	0.0719092	6.29504	0.00187581	1735	1753	1903	1514	1767	1162	94.092	88.761	91.779	71.329	69.051	61.975
WBGene00000666	col-91	protein_coding	-0.696712	0.0719092	7.64191	0.00186163	5943	3850	5915	3142	4140	2771	322.298	194.941	285.271	148.028	161.783	147.79
WBGene00000674	col-99	protein_coding	0.611846	0.0719092	4.05381	0.00185252	215	325	282	419	483	401	11.66	16.456	13.6	19.74	18.875	21.387
WBGene00000553	cmk-1	protein_coding	0.746462	0.0719092	2.549	0.0018508	69	103	104	146	191	146	3.742	5.215	5.016	6.878	7.464	7.787
WBGene00044737	ttr-45	protein_coding	-0.490268	0.0719092	5.67305	0.00187996	1330	1096	1253	895	1132	731	72.128	55.495	60.43	42.166	44.236	38.988
WBGene00018813	F54D11.3	protein_coding	-1.10806	0.0719092	1.21723	0.00187533	86	62	62	38	41	22	4.664	3.139	2.99	1.79	1.602	1.173
WBGene00011439	T04F3.4	protein_coding	-0.74036	0.0719092	2.76299	0.00187179	133	204	203	119	129	87	7.213	10.329	9.79	5.606	5.041	4.64
WBGene00009803	F47B8.2	protein_coding	0.631798	0.0719092	3.45222	0.00183276	142	190	205	335	310	227	7.701	9.62	9.887	15.783	12.114	12.107
WBGene00018510	F46F11.7	protein_coding	0.650604	0.0722707	4.57264	0.00191786	286	490	399	634	718	545	15.51	24.811	19.243	29.87	28.058	29.067
WBGene00018783	cbs-2	protein_coding	0.58582	0.0722707	4.7632	0.00192461	394	446	507	592	896	649	21.367	22.583	24.452	27.891	35.014	34.614
WBGene00020550	T17H7.1	protein_coding	1.16721	0.0722707	5.07385	0.00191007	275	768	436	928	1208	1082	14.914	38.887	21.028	43.721	47.206	57.708
WBGene00001063	dpy-1	protein_coding	1.1104	0.0722707	2.12973	0.00191425	37	87	64	127	142	140	2.007	4.405	3.087	5.983	5.549	7.467
WBGene00015755	C14B9.10	protein_coding	-0.342692	0.0722707	7.16559	0.00192117	2951	3425	3439	2761	2993	2342	160.037	173.422	165.857	130.078	116.96	124.909
WBGene00016845	C50F7.5	protein_coding	1.09582	0.0722707	2.38154	0.00190941	85	94	46	177	165	139	4.61	4.76	2.219	8.339	6.448	7.413
WBGene00001130	dyn-1	protein_coding	0.393241	0.0722707	6.255	0.00190844	1226	1438	1380	1739	2225	1618	66.488	72.812	66.555	81.929	86.948	86.295
WBGene00017748	F23F1.7	protein_coding	-1.15279	0.072353	1.18155	0.00193591	85	58	64	42	32	23	4.61	2.937	3.087	1.979	1.25	1.227
WBGene00022743	mlt-7	protein_coding	-0.56313	0.072353	6.66264	0.00193575	2684	2047	2808	1837	2211	1325	145.558	103.648	135.425	86.546	86.401	70.668
WBGene00010835	M03B6.3	protein_coding	1.30566	0.0723851	4.79049	0.00194133	191	623	369	977	866	924	10.358	31.545	17.796	46.029	33.841	49.281
WBGene00004398	rol-8	protein_coding	0.948921	0.0727646	9.2099	0.00196327	5321	11959	10023	15771	21537	15304	288.566	605.532	483.393	743.016	841.621	816.231
WBGene00011117	R07E5.11	protein_coding	-0.554278	0.0727646	3.83312	0.00197441	345	351	351	296	277	183	18.71	17.773	16.928	13.945	10.825	9.76
WBGene00010212	fbxa-192	protein_coding	-0.643451	0.0727646	2.5962	0.00196943	141	144	171	98	110	98	7.647	7.291	8.247	4.617	4.299	5.227
WBGene00045394	ZK813.7	protein_coding	-2.10205	0.0727646	3.3003	0.00197347	636	433	262	245	81	48	34.491	21.925	12.636	11.543	3.165	2.56
WBGene00012261	lpr-3	protein_coding	1.4749	0.0727646	7.17688	0.00196273	907	3393	1742	5262	4910	5089	49.188	171.801	84.014	247.908	191.873	271.419
WBGene00013851	ZC101.1	protein_coding	0.935977	0.0732711	5.07578	0.00199324	373	641	493	738	1218	1063	20.228	32.456	23.777	34.769	47.597	56.695
WBGene00017305	nspb-12	protein_coding	-0.944007	0.0732711	2.27132	0.00199738	173	110	130	84	81	56	9.382	5.57	6.27	3.957	3.165	2.987
WBGene00003622	nhr-23	protein_coding	0.402072	0.0733954	5.89723	0.00200848	974	1108	1060	1365	1682	1309	52.822	56.103	51.122	64.309	65.729	69.815
WBGene00014108	ZK856.7	protein_coding	-0.413762	0.0733954	5.27915	0.00201001	878	885	948	721	762	649	47.615	44.811	45.72	33.968	29.777	34.614
WBGene00004094	ppw-2	protein_coding	0.421094	0.0738732	7.77451	0.00202775	3376	4027	4103	4826	6502	4838	183.086	203.903	197.881	227.366	254.085	258.032
WBGene00001703	grd-14	protein_coding	-0.503043	0.0739233	7.9557	0.00203378	5547	5151	7438	4258	5497	3617	300.823	260.816	358.723	200.606	214.811	192.911
WBGene00019407	K05F1.5	protein_coding	-0.681959	0.0741268	3.57858	0.00206432	238	335	350	193	205	200	12.907	16.962	16.88	9.093	8.011	10.667
WBGene00023408	cex-2	protein_coding	-0.61199	0.0741268	3.66577	0.00207842	273	332	346	185	257	213	14.805	16.81	16.687	8.716	10.043	11.36
WBGene00018240	cox-17	protein_coding	-0.533327	0.0741268	3.17818	0.00207294	203	237	220	171	181	127	11.009	12	10.61	8.056	7.073	6.773
WBGene00015897	nhr-156	protein_coding	-0.639621	0.0741268	2.939	0.00204858	178	171	236	140	151	101	9.653	8.658	11.382	6.596	5.901	5.387
WBGene00003767	nlp-29	protein_coding	-0.582652	0.0741268	3.4351	0.00207186	249	293	258	174	206	180	13.504	14.836	12.443	8.198	8.05	9.6
WBGene00019654	K11G9.3	protein_coding	-0.955049	0.0741268	1.44964	0.00208137	87	68	77	50	49	27	4.718	3.443	3.714	2.356	1.915	1.44
WBGene00002024	hsp-43	protein_coding	-0.611697	0.0741268	5.40899	0.00207565	1213	938	1049	869	752	578	65.783	47.495	50.592	40.941	29.387	30.827
WBGene00000482	chd-3	protein_coding	0.404235	0.0741268	5.60905	0.00206189	732	930	920	1218	1336	1017	39.698	47.09	44.37	57.383	52.208	54.241
WBGene00000618	col-41	protein_coding	1.38909	0.0741268	4.29623	0.0020525	175	376	216	717	502	857	9.491	19.038	10.417	33.78	19.617	45.708
WBGene00015843	C16C8.5	protein_coding	-0.744423	0.0743734	2.7496	0.00209298	177	180	172	141	125	72	9.599	9.114	8.295	6.643	4.885	3.84
WBGene00019713	pqn-52	protein_coding	-0.343133	0.0746414	7.81617	0.00210715	5136	4874	5378	4382	4958	3443	278.534	246.79	259.372	206.448	193.748	183.631
WBGene00014102	best-25	protein_coding	0.737043	0.0746414	3.2404	0.00210992	122	151	173	211	347	231	6.616	7.646	8.344	9.941	13.56	12.32
WBGene00013835	mlt-4	protein_coding	0.758219	0.075587	2.82576	0.00214141	76	130	132	201	225	162	4.122	6.582	6.366	9.47	8.793	8.64
WBGene00194925	K08D8.11	protein_coding	-1.27754	0.0757565	-0.0056504	0.00215098	32	32	29	17	14	9	1.735	1.62	1.399	0.801	0.547	0.48
WBGene00013077	ttr-24	protein_coding	-0.423736	0.0759674	5.79812	0.00216175	1129	1412	1382	1140	1140	795	61.227	71.495	66.652	53.709	44.549	42.401
WBGene00018261	cyp-33C5	protein_coding	-0.666134	0.0760524	2.47711	0.00217331	122	135	171	91	116	75	6.616	6.836	8.247	4.287	4.533	4
WBGene00013391	Y62H9A.3	protein_coding	-1.63395	0.0760524	3.43267	0.00217375	575	357	280	253	107	77	31.183	18.076	13.504	11.92	4.181	4.107
WBGene00001066	dpy-4	protein_coding	0.711498	0.0761823	10.3578	0.00218439	16444	23065	23433	27438	45344	35500	891.785	1167.87	1130.13	1292.68	1771.95	1893.38
WBGene00017814	F26A10.2	protein_coding	0.605645	0.0761823	5.77995	0.00218705	703	901	1144	1274	1848	1237	38.125	45.621	55.173	60.022	72.216	65.975
WBGene00015002	B0034.1	protein_coding	-0.788968	0.0764107	2.8504	0.00219842	215	158	206	145	120	87	11.66	8	9.935	6.831	4.689	4.64
WBGene00001707	grh-1	protein_coding	0.819976	0.0764989	4.28554	0.00222213	201	392	325	626	542	483	10.901	19.849	15.674	29.493	21.18	25.761
WBGene00017756	F23F12.12	protein_coding	-1.09742	0.0764989	4.02099	0.00228741	732	411	369	250	263	191	39.698	20.811	17.796	11.778	10.277	10.187
WBGene00004986	spp-1	protein_coding	-0.482965	0.0764989	4.92744	0.00225146	640	672	887	540	633	466	34.708	34.026	42.779	25.441	24.736	24.854
WBGene00012557	Y37D8A.19	protein_coding	-1.66787	0.0764989	4.03358	0.00227758	905	614	375	356	169	117	49.08	31.089	18.086	16.772	6.604	6.24
WBGene00020651	T21D12.12	protein_coding	-0.652003	0.0764989	3.96719	0.00228363	472	356	368	277	283	230	25.597	18.026	17.748	13.05	11.059	12.267
WBGene00021082	zip-11	protein_coding	0.595866	0.0764989	2.90831	0.00221705	122	121	125	178	227	181	6.616	6.127	6.029	8.386	8.871	9.654
WBGene00019949	R08C7.5	protein_coding	0.452094	0.0764989	4.54293	0.00225933	372	410	425	531	693	514	20.174	20.76	20.497	25.017	27.081	27.414
WBGene00016084	cht-3	protein_coding	-1.0432	0.0764989	4.99141	0.00228723	1263	883	712	636	508	309	68.495	44.71	34.339	29.964	19.852	16.48
WBGene00011727	T12A7.6	protein_coding	-0.892448	0.0764989	2.1285	0.0022732	117	119	128	85	90	38	6.345	6.025	6.173	4.005	3.517	2.027
WBGene00019808	R01B10.6	protein_coding	-0.467341	0.0764989	4.22025	0.00225546	446	424	455	336	364	304	24.187	21.469	21.944	15.83	14.224	16.214
WBGene00003242	mig-6	protein_coding	0.513557	0.0764989	9.81868	0.00223216	12816	16241	17090	19608	27949	21392	695.032	822.347	824.223	923.788	1092.19	1140.93
WBGene00044174	fipr-5	protein_coding	-1.46079	0.0764989	0.506893	0.00227998	47	45	47	27	11	19	2.549	2.279	2.267	1.272	0.43	1.013
WBGene00007544	fipr-6	protein_coding	-1.86981	0.0764989	0.530858	0.00226045	86	45	43	24	11	14	4.664	2.279	2.074	1.131	0.43	0.747
WBGene00013081	Y51A2D.14	protein_coding	-0.609762	0.0764989	3.49195	0.00228765	240	283	323	235	199	150	13.016	14.329	15.578	11.072	7.777	8
WBGene00020128	R193.2	protein_coding	0.570624	0.0764989	6.83184	0.00223586	1760	2167	1761	2469	3616	2799	95.448	109.724	84.93	116.322	141.306	149.283
WBGene00004729	sax-3	protein_coding	0.396885	0.0764989	5.73976	0.00221145	807	962	1068	1278	1536	1097	43.765	48.71	51.508	60.21	60.024	58.508
WBGene00020738	T23F2.5	protein_coding	-0.64192	0.0764989	4.92171	0.00227184	874	705	730	631	568	368	47.398	35.697	35.207	29.728	22.196	19.627
WBGene00013496	Y70D2A.1	protein_coding	-0.636263	0.0764989	3.02903	0.00228638	213	173	233	133	159	123	11.551	8.76	11.237	6.266	6.213	6.56
WBGene00008975	F20D1.3	protein_coding	0.428643	0.0766874	6.37892	0.00229811	1279	1582	1499	1854	2499	1815	69.362	80.103	72.294	87.347	97.656	96.802
WBGene00006366	sym-1	protein_coding	1.47865	0.0768526	7.01847	0.0023079	806	3123	1525	4967	4260	4490	43.711	158.13	73.548	234.009	166.472	239.472
WBGene00077504	AC3.13	pseudogene	-3.37623	0.0770155	-3.18288	0.00231764	4	12	6	0	1	0	0.217	0.608	0.289	0	0.039	0
WBGene00015859	C16D9.4	protein_coding	-0.535484	0.0773579	3.07217	0.00233282	201	194	217	159	159	125	10.901	9.823	10.466	7.491	6.213	6.667
WBGene00000668	col-93	protein_coding	-0.506737	0.0773879	8.52508	0.00233859	9956	7708	9084	7286	6943	5448	539.93	390.287	438.106	343.264	271.318	290.566
WBGene00043051	C29E4.13	protein_coding	-0.544519	0.0775933	3.65661	0.00234968	286	350	291	237	262	169	15.51	17.722	14.034	11.166	10.238	9.014
WBGene00050904	Y70C5A.3	protein_coding	-1.45458	0.0780309	0.00512633	0.00236785	41	32	29	13	19	7	2.223	1.62	1.399	0.612	0.742	0.373
WBGene00000251	bli-1	protein_coding	1.18349	0.0781005	8.67472	0.00237488	3034	9167	5906	13432	14655	11071	164.539	464.162	284.837	632.819	572.687	590.466
WBGene00020627	T20F5.5	protein_coding	0.500961	0.078123	4.72952	0.00241208	410	505	439	602	812	600	22.235	25.57	21.172	28.362	31.731	32.001
WBGene00017968	F32A5.2	protein_coding	-0.713619	0.078123	6.65217	0.00240601	3081	1984	2877	1973	1707	1342	167.088	100.458	138.753	92.954	66.706	71.575
WBGene00001209	egl-45	protein_coding	0.355407	0.078123	8.66056	0.00242391	6731	7348	7623	9031	11760	8429	365.033	372.059	367.645	425.476	459.556	449.557
WBGene00022075	Y69A2AR.3	protein_coding	-0.453364	0.078123	5.6665	0.00240119	1052	1303	1251	934	948	867	57.052	65.976	60.334	44.003	37.046	46.241
WBGene00009926	noah-2	protein_coding	1.42156	0.078123	7.69281	0.00240001	1346	4873	2532	7244	6925	7235	72.996	246.74	122.114	341.285	270.614	385.875
WBGene00019234	ugt-8	protein_coding	0.621791	0.078123	5.24169	0.00241809	439	678	779	1036	1138	822	23.808	34.33	37.57	48.809	44.471	43.841
WBGene00007365	C06B3.6	protein_coding	-0.840296	0.078123	4.00272	0.00240801	568	362	400	292	304	177	30.804	18.33	19.291	13.757	11.88	9.44
WBGene00003968	peb-1	protein_coding	1.04732	0.078123	2.79904	0.00238625	65	149	93	237	197	203	3.525	7.544	4.485	11.166	7.698	10.827
WBGene00020339	ttr-59	protein_coding	-1.1197	0.078123	3.39668	0.00239557	396	246	314	233	125	116	21.476	12.456	15.144	10.977	4.885	6.187
WBGene00006364	syd-2	protein_coding	0.430732	0.078123	5.67277	0.00242474	735	903	1049	1264	1482	1036	39.86	45.723	50.592	59.551	57.913	55.255
WBGene00008743	F13D12.9	protein_coding	0.638207	0.0785007	6.64387	0.00244141	1174	1885	1907	2355	3128	2470	63.668	95.445	91.971	110.951	122.236	131.736
WBGene00007070	ugt-49	protein_coding	-0.472364	0.0786607	5.05241	0.00245134	710	813	854	701	680	435	38.504	41.165	41.187	33.026	26.573	23.201
WBGene00007325	C05C9.1	protein_coding	0.748635	0.0787052	3.24854	0.00245768	101	181	175	269	316	205	5.477	9.165	8.44	12.673	12.349	10.934
WBGene00020917	W01B11.6	protein_coding	-0.506239	0.0787359	4.74798	0.00247724	570	663	716	573	529	351	30.912	33.57	34.532	26.996	20.672	18.72
WBGene00009898	dod-23	protein_coding	-1.13884	0.0787359	3.06929	0.00248313	382	184	228	126	139	94	20.716	9.317	10.996	5.936	5.432	5.013
WBGene00014245	ZK1307.2	protein_coding	-0.92706	0.0787359	1.22308	0.00249596	59	60	77	31	51	27	3.2	3.038	3.714	1.46	1.993	1.44
WBGene00006449	tag-76	protein_coding	0.474275	0.0787359	7.38633	0.00250164	2431	3015	3210	3633	5132	3841	131.837	152.662	154.813	171.161	200.548	204.858
WBGene00011867	chc-1	protein_coding	0.366949	0.0787359	9.14547	0.00250139	9639	10229	10357	12559	16515	11974	522.738	517.936	499.501	591.69	645.372	638.627
WBGene00006608	tre-2	protein_coding	-0.340706	0.0787359	6.08708	0.00250106	1449	1502	1694	1309	1512	1038	78.582	76.052	81.699	61.671	59.086	55.361
WBGene00008113	C46C2.5	protein_coding	-1.99684	0.0787359	-0.635399	0.00248999	36	20	22	8	4	8	1.952	1.013	1.061	0.377	0.156	0.427
WBGene00004092	ppt-1	protein_coding	0.74861	0.0787359	2.17626	0.00246457	59	80	72	148	126	100	3.2	4.051	3.472	6.973	4.924	5.333
WBGene00013497	hex-5	protein_coding	-0.625571	0.0787359	3.65202	0.00250325	328	274	348	261	224	164	17.788	13.874	16.783	12.296	8.753	8.747
WBGene00000535	cpi-1	protein_coding	-0.44044	0.0787487	5.92511	0.00250862	1304	1299	1724	1102	1348	890	70.718	65.774	83.146	51.918	52.677	47.468
WBGene00015638	C09E7.4	protein_coding	-0.583613	0.0789805	2.89326	0.00252097	172	206	174	139	145	102	9.328	10.431	8.392	6.549	5.666	5.44
WBGene00007684	C18E9.4	protein_coding	-0.316357	0.0794728	6.68048	0.00254169	2122	2327	2498	2008	2219	1627	115.079	117.825	120.474	94.603	86.714	86.775
WBGene00013704	Y106G6D.8	protein_coding	-0.656002	0.0794837	3.23587	0.00257206	215	242	257	195	146	139	11.66	12.253	12.395	9.187	5.705	7.413
WBGene00045407	T07D4.5	protein_coding	-0.56894	0.0794837	2.99404	0.00255103	202	177	210	135	170	112	10.955	8.962	10.128	6.36	6.643	5.973
WBGene00007139	mnp-1	protein_coding	0.593091	0.0794837	3.94279	0.00256505	206	272	286	348	513	352	11.172	13.772	13.793	16.395	20.047	18.774
WBGene00017648	ddo-3	protein_coding	-0.592967	0.0794837	5.5256	0.00255526	1383	992	1088	811	903	670	75.002	50.229	52.472	38.208	35.287	35.734
WBGene00001723	grl-14	protein_coding	0.900419	0.0794837	2.10112	0.00257071	47	88	60	147	132	96	2.549	4.456	2.894	6.926	5.158	5.12
WBGene00194674	F23D12.11	protein_coding	-0.765068	0.0794837	3.45537	0.00256618	362	235	285	190	214	134	19.632	11.899	13.745	8.951	8.363	7.147
WBGene00002282	let-4	protein_coding	1.24134	0.0795229	4.40243	0.00257834	147	462	307	773	628	674	7.972	23.393	14.806	36.418	24.541	35.947
WBGene00000693	col-119	protein_coding	-1.62249	0.079648	7.51882	0.00258741	9359	6456	4560	4586	1893	1222	507.554	326.893	219.921	216.059	73.974	65.175
WBGene00013965	ZK287.4	protein_coding	0.742216	0.0800605	4.2222	0.00260585	242	320	318	396	725	456	13.124	16.203	15.337	18.657	28.331	24.321
WBGene00004048	plx-2	protein_coding	0.563125	0.0802845	4.44972	0.0026213	277	383	447	543	670	482	15.022	19.393	21.558	25.582	26.182	25.707
WBGene00006787	unc-52	protein_coding	0.473051	0.0802845	9.48605	0.00262325	11560	12917	12437	15165	22427	16554	626.917	654.04	599.816	714.466	876.4	882.9
WBGene00021580	clec-174	protein_coding	1.85016	0.0804596	-1.42232	0.00264687	2	4	5	14	18	12	0.108	0.203	0.241	0.66	0.703	0.64
WBGene00044178	C30G7.4	protein_coding	-1.50008	0.0804596	0.509357	0.00264923	68	45	36	23	16	14	3.688	2.279	1.736	1.084	0.625	0.747
WBGene00013748	ssu-1	protein_coding	1.50486	0.0804596	0.129087	0.00264071	8	10	24	34	46	37	0.434	0.506	1.157	1.602	1.798	1.973
WBGene00000742	col-169	protein_coding	0.829925	0.0804596	6.12045	0.00264318	830	1278	1091	1573	2081	2297	45.012	64.71	52.617	74.108	81.321	122.509
WBGene00018789	F54C1.1	protein_coding	-0.72848	0.0808202	2.54057	0.00269773	143	142	169	126	96	70	7.755	7.19	8.151	5.936	3.751	3.733
WBGene00004178	prg-1	protein_coding	0.358948	0.0808202	8.13047	0.00273871	4437	5168	5441	6295	8038	5896	240.626	261.677	262.411	296.575	314.108	314.46
WBGene00003526	nas-7	protein_coding	-0.583034	0.0808202	5.45876	0.00268664	1005	965	1331	698	1063	579	54.503	48.862	64.192	32.885	41.54	30.881
WBGene00011927	T22C8.6	protein_coding	-0.68844	0.0808202	2.82047	0.00268668	179	173	186	118	111	124	9.707	8.76	8.97	5.559	4.338	6.613
WBGene00009444	F35G12.11	protein_coding	-0.509625	0.0808202	4.40598	0.00269852	542	521	474	413	440	285	29.394	26.38	22.86	19.458	17.194	15.2
WBGene00017830	rpb-8	protein_coding	-0.36024	0.0808202	5.75357	0.00273836	1231	1238	1234	1075	1138	822	66.759	62.685	59.514	50.646	44.471	43.841
WBGene00018965	F56D2.3	protein_coding	1.05547	0.0808202	4.75757	0.00276795	201	532	502	794	1018	690	10.901	26.937	24.211	37.408	39.781	36.801
WBGene00020047	ttr-32	protein_coding	-1.01867	0.0808202	2.82401	0.0027541	270	153	207	135	119	69	14.643	7.747	9.983	6.36	4.65	3.68
WBGene00008079	C44B9.2	protein_coding	0.598822	0.0808202	4.41473	0.00270648	331	361	356	453	696	536	17.951	18.279	17.169	21.342	27.198	28.587
WBGene00022246	acp-7	protein_coding	-0.856957	0.0808202	2.07603	0.00276559	137	110	101	76	80	45	7.43	5.57	4.871	3.581	3.126	2.4
WBGene00009542	copb-2	protein_coding	0.350664	0.0808202	8.52704	0.00269974	5890	6711	7262	8358	10620	7602	319.424	339.805	350.234	393.769	415.007	405.449
WBGene00000509	cka-1	protein_coding	-0.413778	0.0808202	5.59275	0.00274994	1184	1120	1075	940	1018	710	64.21	56.71	51.845	44.286	39.781	37.868
WBGene00004083	pph-1	protein_coding	-0.638303	0.0808202	3.94808	0.002738	454	321	402	250	303	232	24.621	16.254	19.388	11.778	11.841	12.374
WBGene00009469	F36D3.1	protein_coding	0.588986	0.0808202	3.5972	0.00270399	189	226	183	286	357	299	10.25	11.443	8.826	13.474	13.951	15.947
WBGene00013073	hmit-1.1	protein_coding	-0.581921	0.0808202	4.5708	0.00274015	518	507	768	415	491	335	28.092	25.671	37.039	19.552	19.187	17.867
WBGene00000033	abu-10	protein_coding	-0.771028	0.0808202	4.17945	0.00273167	528	401	515	223	405	274	28.634	20.304	24.838	10.506	15.827	14.614
WBGene00021060	dct-11	protein_coding	-0.488526	0.0808202	4.65481	0.00271445	603	518	699	465	520	370	32.702	26.228	33.712	21.907	20.321	19.734
WBGene00019148	H03E18.1	protein_coding	1.0765	0.0808202	7.16537	0.0027613	1161	3310	2062	4525	4839	3873	62.963	167.599	99.447	213.185	189.098	206.565
WBGene00011107	R07E3.6	protein_coding	1.2597	0.0808202	6.15756	0.00275878	506	1746	906	2349	2421	2230	27.441	88.407	43.695	110.668	94.608	118.936
WBGene00000752	col-179	protein_coding	-1.2983	0.0808202	5.82845	0.0027468	2933	1473	1355	1117	700	564	159.061	74.584	65.349	52.625	27.355	30.081
WBGene00001898	his-24	protein_coding	0.745622	0.0808202	4.94739	0.00276709	346	614	518	714	1011	831	18.764	31.089	24.982	33.639	39.508	44.321
WBGene00015907	C17F3.1	protein_coding	-0.467249	0.0809747	4.51634	0.00279106	528	507	600	470	469	310	28.634	25.671	28.937	22.143	18.328	16.534
WBGene00004416	rpl-5	protein_coding	0.429083	0.0809747	10.7889	0.00279874	27232	32820	32688	38886	50999	40708	1476.84	1661.81	1576.49	1832.03	1992.93	2171.14
WBGene00009713	F44G4.3	protein_coding	-0.539591	0.0809747	3.36691	0.00279482	232	254	266	211	183	151	12.582	12.861	12.829	9.941	7.151	8.054
WBGene00018084	F36A4.5	protein_coding	-1.87411	0.0809747	-0.274368	0.00279383	45	19	36	10	8	8	2.44	0.962	1.736	0.471	0.313	0.427
WBGene00016594	C42D4.1	protein_coding	-0.333184	0.0809747	7.26951	0.00278876	3294	3502	3709	3156	3413	2249	178.639	177.32	178.879	148.688	133.373	119.949
WBGene00010242	F58D5.2	protein_coding	-1.084	0.081651	0.819708	0.0028459	61	54	42	24	32	20	3.308	2.734	2.026	1.131	1.25	1.067
WBGene00021136	W10G11.3	protein_coding	-1.9831	0.081651	0.302217	0.00284243	84	34	41	18	10	11	4.555	1.722	1.977	0.848	0.391	0.587
WBGene00012875	Y45F10B.13	protein_coding	0.39818	0.081651	6.60689	0.00284781	1478	1763	1930	2187	2885	2075	80.154	89.268	93.081	103.036	112.74	110.669
WBGene00000030	abu-7	protein_coding	-0.870398	0.081651	4.13019	0.00284536	570	383	502	205	396	247	30.912	19.393	24.211	9.658	15.475	13.174
WBGene00018024	F35A5.1	protein_coding	0.461056	0.081651	6.53373	0.00284602	1565	1594	1622	1980	2787	2175	84.872	80.711	78.226	93.283	108.91	116.003
WBGene00019318	K02E10.4	protein_coding	1.14431	0.0816671	4.09188	0.00285351	123	376	262	588	535	491	6.67	19.038	12.636	27.702	20.907	26.187
WBGene00004951	spc-1	protein_coding	0.372238	0.0817038	8.36317	0.00285994	5333	5784	6472	7270	9659	6989	289.217	292.867	312.134	342.51	377.453	372.755
WBGene00008605	mlt-9	protein_coding	1.01065	0.081763	7.0987	0.00286716	1097	2892	2326	4284	4763	3382	59.492	146.434	112.179	201.831	186.128	180.377
WBGene00010135	F55H12.4	protein_coding	-0.805254	0.0817739	6.22568	0.00289199	2410	1646	2005	1617	1074	976	130.698	83.344	96.698	76.181	41.97	52.054
WBGene00015647	C09F5.1	protein_coding	0.566587	0.0817739	3.62603	0.00287346	171	240	207	356	332	268	9.274	12.152	9.983	16.772	12.974	14.294
WBGene00002827	let-653	protein_coding	1.17547	0.0817739	4.19695	0.00289843	143	421	242	645	532	580	7.755	21.317	11.671	30.388	20.789	30.934
WBGene00004099	abu-15	protein_coding	-0.856102	0.0817739	4.4393	0.00288808	745	422	654	306	444	285	40.403	21.368	31.541	14.417	17.351	15.2
WBGene00001991	hot-6	protein_coding	-0.869247	0.0817739	1.4782	0.00289033	67	83	77	57	41	34	3.634	4.203	3.714	2.685	1.602	1.813
WBGene00219546	F41E7.20	ncRNA	-1.59081	0.0817739	-1.06793	0.00289349	13	19	17	5	6	5	0.705	0.962	0.82	0.236	0.234	0.267
WBGene00021079	W08A12.2	protein_coding	0.854353	0.0817936	1.58949	0.00290428	49	51	36	95	92	69	2.657	2.582	1.736	4.476	3.595	3.68
WBGene00016422	noah-1	protein_coding	1.33269	0.0818587	7.72759	0.00291397	1418	4857	2843	7861	6536	6924	76.9	245.93	137.113	370.354	255.413	369.288
WBGene00017428	F13D11.3	protein_coding	-0.653537	0.0818587	2.48969	0.0029169	127	154	147	114	107	67	6.887	7.798	7.09	5.371	4.181	3.573
WBGene00012675	Y39B6A.13	protein_coding	-0.667719	0.0819758	2.39904	0.0029299	141	131	128	89	90	85	7.647	6.633	6.173	4.193	3.517	4.533
WBGene00044724	R02E4.3	protein_coding	-0.520314	0.0819758	5.89306	0.00293139	1261	1264	1859	1019	1276	877	68.386	64.001	89.657	48.008	49.863	46.774
WBGene00017289	F09E5.11	protein_coding	-0.435235	0.0821491	4.26524	0.00296101	445	475	434	357	394	299	24.133	24.051	20.931	16.819	15.397	15.947
WBGene00004397	rol-6	protein_coding	0.655539	0.0821491	8.77841	0.00295564	4852	8400	8654	11637	13946	9626	263.132	425.326	417.368	548.252	544.98	513.398
WBGene00006367	sym-2	protein_coding	0.882498	0.0821491	5.07988	0.00296345	355	759	466	889	1042	985	19.252	38.431	22.474	41.883	40.719	52.534
WBGene00021161	Y4C6B.7	protein_coding	-0.532602	0.0821491	3.12162	0.00294951	185	214	235	166	160	133	10.033	10.836	11.334	7.821	6.252	7.093
WBGene00009533	F38B7.2	protein_coding	-0.646114	0.0821491	3.04048	0.00294688	222	211	194	155	175	95	12.039	10.684	9.356	7.302	6.839	5.067
WBGene00012140	T28F4.5	protein_coding	-0.446724	0.0824907	7.35996	0.00299879	3288	3840	4605	3020	3856	2230	178.314	194.435	222.092	142.281	150.684	118.936
WBGene00020471	pho-14	protein_coding	0.449715	0.0824907	6.11327	0.00298983	1164	1152	1273	1487	2098	1586	63.126	58.33	61.395	70.057	81.985	84.589
WBGene00004782	set-2	protein_coding	0.338486	0.0824907	6.45393	0.00299559	1508	1643	1573	2022	2439	1813	81.781	83.192	75.863	95.262	95.311	96.695
WBGene00013033	Y49E10.10	protein_coding	0.443322	0.0824907	4.91225	0.00298857	509	520	534	667	914	662	27.604	26.33	25.754	31.424	35.717	35.307
WBGene00000029	abu-6	protein_coding	-1.07719	0.0824907	3.78151	0.00300174	522	282	442	144	260	211	28.309	14.279	21.317	6.784	10.16	11.254
WBGene00002915	let-805	protein_coding	0.434711	0.0826724	8.43507	0.00301355	5959	5990	6085	7384	10834	7604	323.166	303.298	293.47	347.881	423.37	405.556
WBGene00000549	cls-2	protein_coding	0.379499	0.0830693	6.30846	0.00303325	1284	1480	1451	1756	2310	1701	69.633	74.938	69.979	82.73	90.27	90.722
WBGene00003664	nhr-74	protein_coding	1.05515	0.0832075	2.29138	0.00309413	49	109	58	171	140	138	2.657	5.519	2.797	8.056	5.471	7.36
WBGene00006789	unc-54	protein_coding	0.466332	0.0832075	12.2406	0.00309184	72146	89505	89068	104171	148730	110854	3912.59	4532	4295.6	4907.79	5812.06	5912.34
WBGene00015853	C16C8.16	protein_coding	-0.493038	0.0832075	4.50897	0.00307275	601	517	523	441	457	325	32.593	26.178	25.223	20.777	17.859	17.334
WBGene00015515	spdl-1	protein_coding	0.340241	0.0832075	5.61007	0.00307636	816	913	902	1160	1342	995	44.253	46.229	43.502	54.651	52.443	53.068
WBGene00011313	T01B7.8	protein_coding	-0.830127	0.0832075	1.95124	0.00307005	116	91	104	51	69	64	6.291	4.608	5.016	2.403	2.696	3.413
WBGene00019212	H19M22.3	protein_coding	1.17656	0.0832075	4.1754	0.00310952	133	428	245	616	565	546	7.213	21.671	11.816	29.021	22.079	29.121
WBGene00016249	mrpl-32	protein_coding	-0.434409	0.0832075	5.061	0.00310432	810	787	752	652	642	528	43.928	39.849	36.268	30.718	25.088	28.161
WBGene00004391	rnr-1	protein_coding	0.356591	0.0832075	7.407	0.00310787	2934	3300	2869	4175	4604	3439	159.116	167.092	138.367	196.696	179.915	183.417
WBGene00013477	Y69E1A.5	protein_coding	-0.443475	0.0832075	5.1025	0.00308872	749	745	942	667	653	550	40.619	37.722	45.431	31.424	25.518	29.334
WBGene00013325	Y57G11C.36	protein_coding	0.462541	0.0832075	5.26036	0.00306111	586	646	751	864	1089	908	31.78	32.71	36.22	40.705	42.556	48.428
WBGene00002273	lec-10	protein_coding	0.381417	0.0832075	7.99657	0.00304618	3950	5063	4614	6435	6613	5431	214.215	256.36	222.526	303.171	258.422	289.66
WBGene00011404	T03F7.7	protein_coding	-0.498862	0.0832075	4.45601	0.00311164	534	517	530	470	418	297	28.96	26.178	25.561	22.143	16.335	15.84
WBGene00004002	pgp-8	protein_coding	-1.22778	0.0832075	-0.323773	0.003092	22	24	27	11	13	8	1.193	1.215	1.302	0.518	0.508	0.427
WBGene00008691	mff-1	protein_coding	-0.648037	0.0832075	2.55858	0.00305277	139	171	139	112	116	73	7.538	8.658	6.704	5.277	4.533	3.893
WBGene00045077	Y71A12B.18	pseudogene	0.984075	0.0833477	1.07803	0.00312213	34	22	35	60	67	60	1.844	1.114	1.688	2.827	2.618	3.2
WBGene00021890	Y54G2A.26	protein_coding	0.467745	0.0834326	6.12061	0.00313056	1105	1351	1140	1536	2107	1581	59.926	68.407	54.98	72.365	82.337	84.322
WBGene00044235	C06A1.7	protein_coding	-1.30135	0.0834693	0.748615	0.00313719	53	44	62	13	32	26	2.874	2.228	2.99	0.612	1.25	1.387
WBGene00018422	F44E2.9	protein_coding	-0.71578	0.0836543	3.18803	0.00316117	268	220	219	175	139	138	14.534	11.139	10.562	8.245	5.432	7.36
WBGene00006843	unc-119	protein_coding	0.565535	0.0836543	3.09758	0.00316521	138	128	160	248	228	186	7.484	6.481	7.717	11.684	8.91	9.92
WBGene00018777	F53H1.3	protein_coding	0.451959	0.0836543	4.28632	0.00315793	344	330	336	451	590	415	18.656	16.709	16.205	21.248	23.056	22.134
WBGene00014077	ZK792.4	protein_coding	-0.724139	0.0836543	2.49432	0.00316092	140	126	172	102	87	89	7.592	6.38	8.295	4.806	3.4	4.747
WBGene00020033	R12E2.7	protein_coding	-0.495195	0.0836965	6.83289	0.00317943	2469	2424	3414	1897	2647	1643	133.898	122.737	164.652	89.373	103.439	87.629
WBGene00017574	F18F11.1	protein_coding	-0.440342	0.0836965	4.5546	0.00317818	531	504	628	409	498	376	28.797	25.52	30.287	19.269	19.461	20.054
WBGene00007944	C34F6.10	protein_coding	0.350834	0.0836965	5.88644	0.00318262	950	1148	1083	1404	1645	1205	51.52	58.128	52.231	66.146	64.283	64.268
WBGene00000870	cyd-1	protein_coding	0.9684	0.0838556	1.77967	0.0031945	48	66	37	115	97	92	2.603	3.342	1.784	5.418	3.791	4.907
WBGene00020620	T20D4.15	protein_coding	-0.999484	0.0838556	0.778602	0.00319922	38	61	49	25	30	21	2.061	3.089	2.363	1.178	1.172	1.12
WBGene00006318	sup-9	protein_coding	0.850146	0.0840628	1.40691	0.00321242	32	47	41	71	101	57	1.735	2.38	1.977	3.345	3.947	3.04
WBGene00001008	dlk-1	protein_coding	0.3362	0.0842341	6.23267	0.00322427	1215	1387	1465	1811	2174	1428	65.891	70.229	70.655	85.321	84.955	76.162
WBGene00021292	copb-1	protein_coding	0.351997	0.0843403	7.82145	0.00323365	3853	4119	4164	4983	6448	4848	208.954	208.562	200.823	234.763	251.974	258.566
WBGene00000723	col-150	protein_coding	-0.58817	0.0845106	5.7224	0.00325082	1348	1014	1631	925	1042	773	73.104	51.343	78.66	43.579	40.719	41.228
WBGene00020770	eat-17	protein_coding	0.477096	0.0845106	5.88885	0.00324607	884	970	1214	1319	1910	1266	47.941	49.115	58.549	62.142	74.639	67.521
WBGene00022033	Y65B4BL.1	protein_coding	1.14816	0.0849259	6.31052	0.00328828	578	1889	1134	2449	2890	2189	31.346	95.648	54.691	115.379	112.935	116.749
WBGene00001074	dpy-13	protein_coding	0.722837	0.0849259	10.6689	0.00327676	18225	29658	31033	35815	57528	41432	988.371	1501.7	1496.67	1687.35	2248.07	2209.76
WBGene00004419	rpl-7A	protein_coding	0.475646	0.0849259	10.4709	0.00329173	22290	26978	23887	30672	41863	34062	1208.82	1366.01	1152.03	1445.04	1635.92	1816.68
WBGene00013106	set-26	protein_coding	0.697708	0.0849259	5.70484	0.00329352	938	840	716	1123	1703	1431	50.869	42.533	34.532	52.908	66.55	76.322
WBGene00044019	C55A6.12	protein_coding	-0.359338	0.0849259	5.90377	0.00328006	1283	1290	1549	1199	1252	918	69.579	65.318	74.706	56.488	48.926	48.961
WBGene00018342	F42A10.6	protein_coding	-0.411054	0.0851486	4.61673	0.00330752	526	557	635	500	502	357	28.526	28.203	30.625	23.556	19.617	19.04
WBGene00003076	lsm-1	protein_coding	-0.523588	0.0853461	4.53092	0.00332119	635	509	542	443	442	340	34.437	25.773	26.14	20.871	17.272	18.134
WBGene00013852	hhat-1	protein_coding	0.613433	0.0853461	5.50937	0.00332633	526	936	831	1217	1410	975	28.526	47.393	40.078	57.336	55.1	52.001
WBGene00018589	F48B9.3	protein_coding	-0.730113	0.0853461	1.80554	0.00333131	74	92	109	61	69	43	4.013	4.658	5.257	2.874	2.696	2.293
WBGene00000606	col-17	protein_coding	0.759536	0.0854395	9.1246	0.00335104	5767	10931	10316	13317	19712	13621	312.754	553.481	497.524	627.401	770.304	726.469
WBGene00020104	R148.5	protein_coding	0.552436	0.0854395	4.84452	0.0033511	403	582	464	686	814	708	21.855	29.469	22.378	32.319	31.809	37.761
WBGene00012224	W03G11.2	protein_coding	-0.641715	0.0854395	2.4451	0.00334616	127	137	150	103	117	62	6.887	6.937	7.234	4.853	4.572	3.307
WBGene00018380	decr-1.1	protein_coding	-1.41523	0.0854826	2.11802	0.00335817	177	105	151	95	35	53	9.599	5.317	7.282	4.476	1.368	2.827
WBGene00018418	F44E2.4	protein_coding	0.71873	0.0858062	7.06654	0.00337628	1453	2772	2325	3880	3617	3390	78.799	140.358	112.131	182.798	141.345	180.804
WBGene00012257	lpr-4	protein_coding	1.2941	0.0859753	6.82558	0.00338835	783	2725	1458	4347	3415	3540	42.463	137.978	70.317	204.799	133.451	188.804
WBGene00004497	rps-28	protein_coding	-0.30993	0.0861621	8.94045	0.00342177	10488	10927	11761	9124	10769	8163	568.781	553.278	567.214	429.857	420.83	435.37
WBGene00009093	F23H12.3	protein_coding	-0.558427	0.0861621	2.46371	0.00340694	128	138	138	104	104	80	6.942	6.987	6.656	4.9	4.064	4.267
WBGene00194706	C53A5.16	protein_coding	-0.500358	0.0861621	3.40976	0.00342826	244	281	241	199	209	159	13.233	14.228	11.623	9.375	8.167	8.48
WBGene00017690	ceh-60	protein_coding	-0.392119	0.0861621	4.50759	0.00341466	492	505	585	426	494	346	26.682	25.57	28.214	20.07	19.304	18.454
WBGene00008865	F15G9.1	protein_coding	-0.427454	0.0861621	7.02329	0.00342626	3137	2583	3486	2436	2675	2022	170.125	130.788	168.124	114.767	104.533	107.842
WBGene00004313	rbc-1	protein_coding	0.390033	0.0861621	6.9249	0.00342434	1989	2082	2375	2637	3660	2604	107.867	105.42	114.542	124.236	143.025	138.883
WBGene00009653	F43D9.1	protein_coding	0.675264	0.0863799	3.90363	0.00344236	177	305	249	372	442	387	9.599	15.443	12.009	17.526	17.272	20.64
WBGene00007170	B0393.5	protein_coding	0.834284	0.0865465	5.57459	0.00345445	434	968	883	1456	1507	1103	23.537	49.014	42.586	68.596	58.89	58.828
WBGene00009745	F45H11.5	protein_coding	-0.506712	0.0866943	3.75244	0.00346581	288	324	362	276	242	202	15.619	16.405	17.459	13.003	9.457	10.774
WBGene00014179	ZK1010.5	protein_coding	0.483329	0.0866955	5.99978	0.00347131	924	1090	1291	1396	2011	1443	50.11	55.191	62.263	65.769	78.586	76.962
WBGene00020396	T10B5.10	protein_coding	0.788287	0.0868841	3.73978	0.00348434	133	258	249	341	483	307	7.213	13.064	12.009	16.065	18.875	16.374
WBGene00008442	E01B7.2	protein_coding	-0.482619	0.0873427	3.22972	0.00350822	213	237	222	177	197	132	11.551	12	10.707	8.339	7.698	7.04
WBGene00015024	B0205.10	protein_coding	0.458309	0.0875015	6.35874	0.00352011	1192	1543	1532	1783	2541	1837	64.644	78.128	73.886	84.002	99.297	97.976
WBGene00219425	Y54G2A.73	protein_coding	0.540234	0.0883131	3.98998	0.00356086	239	305	257	357	512	358	12.961	15.443	12.395	16.819	20.008	19.094
WBGene00013647	Y105C5B.5	protein_coding	-0.719855	0.0883131	4.50833	0.00356994	667	656	469	454	376	303	36.172	33.216	22.619	21.389	14.693	16.16
WBGene00009241	F28H7.8	protein_coding	-0.495575	0.0883131	4.1625	0.003575	409	379	511	334	388	245	22.181	19.19	24.645	15.736	15.162	13.067
WBGene00021529	Y41G9A.5	protein_coding	1.1533	0.0883131	2.78455	0.00357163	58	143	93	199	202	259	3.145	7.241	4.485	9.375	7.894	13.814
WBGene00009306	F32A7.5	protein_coding	0.497622	0.088683	7.15069	0.00359556	1978	2639	2693	3051	4500	3276	107.27	133.623	129.879	143.741	175.851	174.724
WBGene00006754	unc-15	protein_coding	0.507351	0.0887208	11.0598	0.00363088	29477	40419	39713	46506	64605	51179	1598.59	2046.58	1915.29	2191.03	2524.63	2729.61
WBGene00020803	T25E4.1	protein_coding	-0.784304	0.0887208	4.78681	0.00361418	681	621	923	324	640	418	36.932	31.444	44.515	15.265	25.01	22.294
WBGene00000170	aqp-2	protein_coding	0.39766	0.0887208	6.14069	0.00362269	1054	1369	1319	1689	1877	1569	57.16	69.318	63.613	79.574	73.349	83.682
WBGene00008448	E01G4.6	protein_coding	0.854893	0.0887208	10.8865	0.00365295	17413	36570	36071	50349	70414	43450	944.335	1851.69	1739.64	2372.08	2751.63	2317.39
WBGene00012271	W05B2.2	protein_coding	1.23647	0.0887208	0.647938	0.00364726	21	30	13	44	63	45	1.139	1.519	0.627	2.073	2.462	2.4
WBGene00021939	Y55F3BR.2	protein_coding	0.612162	0.0887208	4.85136	0.00364769	422	552	447	616	948	728	22.886	27.95	21.558	29.021	37.046	38.828
WBGene00002005	hsp-1	protein_coding	0.366691	0.0887208	11.7559	0.00363028	55594	63793	65639	76467	99509	74296	3014.95	3230.1	3165.66	3602.57	3888.6	3962.54
WBGene00010850	M04C3.1	protein_coding	-0.359335	0.0887208	5.96169	0.00363247	1299	1383	1605	1220	1248	1024	70.447	70.027	77.407	57.478	48.769	54.615
WBGene00019738	clec-265	protein_coding	0.38655	0.0887208	4.68022	0.00364121	408	489	463	620	710	534	22.126	24.76	22.33	29.21	27.745	28.481
WBGene00007348	C05G5.2	protein_coding	0.488673	0.0887208	3.54519	0.00361297	165	209	226	285	346	250	8.948	10.583	10.9	13.427	13.521	13.334
WBGene00016891	C53A3.1	protein_coding	-1.21301	0.0890001	0.233443	0.00367005	29	49	32	18	18	12	1.573	2.481	1.543	0.848	0.703	0.64
WBGene00020707	wago-10	protein_coding	0.749192	0.0895766	5.75967	0.00371074	562	1029	1030	1258	1854	1396	30.478	52.102	49.675	59.268	72.45	74.455
WBGene00003495	mup-2	protein_coding	0.559334	0.0895766	9.93805	0.00370769	12104	18743	19168	22934	29697	23133	656.419	949.034	924.441	1080.48	1160.5	1233.79
WBGene00003987	pes-23	protein_coding	-0.90664	0.0895766	2.03048	0.00370316	125	91	126	88	62	44	6.779	4.608	6.077	4.146	2.423	2.347
WBGene00015457	C04G6.7	protein_coding	-0.838296	0.0895999	2.12069	0.00373498	128	91	135	60	75	71	6.942	4.608	6.511	2.827	2.931	3.787
WBGene00020027	R12C12.7	protein_coding	-0.466695	0.0895999	4.79641	0.00375683	693	700	593	531	575	401	37.583	35.444	28.599	25.017	22.47	21.387
WBGene00007229	C01G6.9	protein_coding	-1.07618	0.0895999	1.06594	0.00374247	62	64	56	45	24	25	3.362	3.241	2.701	2.12	0.938	1.333
WBGene00016764	C49A9.10	protein_coding	-0.761721	0.0895999	2.57683	0.00372512	162	182	133	96	134	67	8.786	9.215	6.414	4.523	5.236	3.573
WBGene00020893	T28C12.6	protein_coding	-0.81511	0.0895999	2.66196	0.003756	175	131	215	105	137	68	9.491	6.633	10.369	4.947	5.354	3.627
WBGene00010597	K06A4.7	protein_coding	-0.33161	0.0895999	5.70446	0.00373528	1144	1217	1182	1008	1113	835	62.041	61.622	57.006	47.49	43.494	44.534
WBGene00002259	lbp-7	protein_coding	-0.397516	0.0895999	5.64912	0.00372331	982	1179	1356	999	1048	745	53.255	59.698	65.398	47.066	40.954	39.734
WBGene00045265	K10C2.8	protein_coding	-2.07037	0.0895999	1.96874	0.00374922	231	185	104	111	33	16	12.528	9.367	5.016	5.23	1.29	0.853
WBGene00019150	H04J21.1	protein_coding	0.425725	0.089812	3.88954	0.00377138	230	266	280	358	440	299	12.473	13.469	13.504	16.866	17.194	15.947
WBGene00018041	F35D2.3	protein_coding	0.775935	0.08992	2.10431	0.00380198	49	83	69	130	119	108	2.657	4.203	3.328	6.125	4.65	5.76
WBGene00014053	ZK669.3	protein_coding	-1.14988	0.08992	2.22777	0.00379979	188	116	127	103	55	50	10.196	5.874	6.125	4.853	2.149	2.667
WBGene00000671	col-96	protein_coding	-0.798536	0.08992	3.66953	0.00379364	460	286	297	216	233	164	24.947	14.481	14.324	10.176	9.105	8.747
WBGene00010085	F55B11.3	protein_coding	-1.51821	0.08992	3.02732	0.00379699	443	208	238	192	86	61	24.025	10.532	11.478	9.046	3.361	3.253
WBGene00010961	MTCE.16	protein_coding	-1.06374	0.08992	6.25236	0.00380422	1988	3552	1546	1107	1059	1177	107.812	179.852	74.561	52.154	41.384	62.775
WBGene00009398	nspb-11	protein_coding	-1.01336	0.0900554	1.55556	0.00382129	112	65	81	49	44	37	6.074	3.291	3.906	2.309	1.719	1.973
WBGene00011077	R07B1.5	protein_coding	0.750664	0.0900554	2.12124	0.00381775	49	87	71	117	145	98	2.657	4.405	3.424	5.512	5.666	5.227
WBGene00020919	set-19	protein_coding	0.580989	0.0901769	4.80847	0.00383212	336	523	557	686	833	662	18.222	26.482	26.863	32.319	32.552	35.307
WBGene00018985	F56F10.2	protein_coding	0.552288	0.0904782	3.00128	0.00385062	117	138	144	210	210	194	6.345	6.987	6.945	9.894	8.206	10.347
WBGene00001045	dnj-27	protein_coding	0.62392	0.0906674	5.28098	0.00388827	454	802	687	1020	1086	955	24.621	40.608	33.133	48.055	42.439	50.934
WBGene00001709	grk-2	protein_coding	0.498555	0.0906674	3.83498	0.00388443	214	253	261	317	447	321	11.606	12.81	12.588	14.935	17.468	17.12
WBGene00020598	T20B6.2	protein_coding	0.614206	0.0906674	2.40547	0.00390787	77	83	98	135	147	133	4.176	4.203	4.726	6.36	5.744	7.093
WBGene00011119	R07E5.13	protein_coding	-0.342987	0.0906674	6.16897	0.00387734	1588	1640	1679	1483	1438	1142	86.12	83.04	80.975	69.868	56.194	60.908
WBGene00022287	Y75B7AR.1	protein_coding	0.657456	0.0906674	6.16868	0.00390826	811	1293	1468	1665	2464	1684	43.982	65.47	70.799	78.443	96.288	89.815
WBGene00001716	grl-7	protein_coding	0.918404	0.0906674	7.91069	0.00391005	2115	5215	3999	6599	8955	5724	114.7	264.056	192.865	310.897	349.943	305.287
WBGene00009532	ccch-1	protein_coding	-0.501959	0.0906674	6.26668	0.00387699	1995	1547	2053	1242	1719	1182	108.192	78.331	99.013	58.514	67.175	63.041
WBGene00164968	K08H2.10	protein_coding	-1.17798	0.0906674	0.652137	0.00386635	47	38	59	33	20	15	2.549	1.924	2.845	1.555	0.782	0.8
WBGene00008978	cutl-3	protein_coding	0.932565	0.0906674	1.46313	0.00390046	40	49	32	97	76	69	2.169	2.481	1.543	4.57	2.97	3.68
WBGene00010274	F58G6.3	protein_coding	-0.607879	0.0907706	3.19733	0.00392021	238	241	205	148	166	156	12.907	12.203	9.887	6.973	6.487	8.32
WBGene00007415	C07E3.4	protein_coding	0.744857	0.0908286	3.78286	0.00392844	146	280	237	352	412	368	7.918	14.178	11.43	16.584	16.1	19.627
WBGene00044607	K02A11.4	protein_coding	-1.07806	0.0910073	0.826564	0.00394189	38	64	54	23	25	29	2.061	3.241	2.604	1.084	0.977	1.547
WBGene00008284	C53D6.7	protein_coding	-0.740276	0.0912818	3.66827	0.00397102	421	265	326	234	213	177	22.832	13.418	15.722	11.024	8.324	9.44
WBGene00014454	MTCE.7	rRNA	-0.736745	0.0912818	2.77664	0.00396481	148	237	160	119	119	98	8.026	12	7.717	5.606	4.65	5.227
WBGene00007174	mboa-1	protein_coding	0.776182	0.0912818	3.71866	0.00396606	131	278	226	359	412	325	7.104	14.076	10.9	16.913	16.1	17.334
WBGene00006572	tin-9.1	protein_coding	-0.40847	0.0918403	5.06363	0.0040011	690	851	796	647	644	550	37.42	43.09	38.39	30.482	25.166	29.334
WBGene00045249	T07A9.15	protein_coding	-0.619209	0.0923055	2.50049	0.00403142	132	145	145	112	92	86	7.159	7.342	6.993	5.277	3.595	4.587
WBGene00018738	F53B1.6	protein_coding	0.758466	0.0923055	3.22565	0.00403299	95	194	163	274	289	213	5.152	9.823	7.861	12.909	11.294	11.36
WBGene00004475	rps-6	protein_coding	0.386466	0.0925181	10.7263	0.0040481	25156	32415	32874	38535	48229	36492	1364.25	1641.3	1585.46	1815.49	1884.69	1946.28
WBGene00015298	C01F1.3	protein_coding	0.988808	0.0929533	4.98264	0.00407885	285	720	445	987	876	968	15.456	36.457	21.462	46.5	34.232	51.628
WBGene00022616	hsd-3	protein_coding	1.94841	0.0929533	-1.00661	0.00407422	2	11	4	21	20	20	0.108	0.557	0.193	0.989	0.782	1.067
WBGene00006528	tba-1	protein_coding	0.329386	0.0941374	8.91155	0.00414266	7606	9354	9177	11101	13368	9894	412.486	473.631	442.592	522.999	522.393	527.692
WBGene00008233	C50F4.8	protein_coding	-0.858539	0.0941374	4.49731	0.00414052	836	460	611	396	452	241	45.338	23.292	29.468	18.657	17.663	12.854
WBGene00018169	nspb-2	protein_coding	-2.71931	0.0941739	-2.53131	0.0041502	11	6	10	1	3	0	0.597	0.304	0.482	0.047	0.117	0
WBGene00003905	pad-1	protein_coding	0.361888	0.0942428	6.96418	0.00415917	2249	2222	2201	2760	3651	2626	121.967	112.509	106.151	130.031	142.673	140.056
WBGene00014057	ZK673.1	protein_coding	0.848395	0.0946644	3.01313	0.00420161	105	170	98	203	244	241	5.694	8.608	4.726	9.564	9.535	12.854
WBGene00012597	nhr-235	protein_coding	1.40545	0.0946644	0.0828494	0.0041977	12	21	8	30	46	33	0.651	1.063	0.386	1.413	1.798	1.76
WBGene00022173	set-27	protein_coding	0.423321	0.0946644	5.17814	0.00418935	509	670	734	885	1041	748	27.604	33.925	35.4	41.695	40.68	39.894
WBGene00013866	cbs-1	protein_coding	0.393006	0.0946644	4.74627	0.00419756	406	478	542	648	757	554	22.018	24.203	26.14	30.529	29.582	29.547
WBGene00004412	rpl-1	protein_coding	0.444881	0.0948533	10.6877	0.00423439	25575	32134	28328	35718	48558	38342	1386.97	1627.07	1366.21	1682.78	1897.55	2044.95
WBGene00023485	ttr-49	protein_coding	-0.571715	0.0948533	2.71835	0.00423481	150	151	188	114	148	85	8.135	7.646	9.067	5.371	5.784	4.533
WBGene00008993	F21A3.3	protein_coding	-0.532185	0.0948533	5.57915	0.00423985	1078	968	1499	808	1054	687	58.462	49.014	72.294	38.067	41.188	36.641
WBGene00003412	mrp-6	protein_coding	0.483218	0.0948533	4.57083	0.00423421	330	409	491	554	705	532	17.896	20.709	23.68	26.1	27.55	28.374
WBGene00004219	ptr-4	protein_coding	0.761646	0.0948533	7.08478	0.00422499	1324	2826	2485	3986	4263	3042	71.803	143.092	119.847	187.792	166.589	162.244
WBGene00020262	ferl-1	protein_coding	0.953328	0.0949651	0.994659	0.00425083	29	23	35	54	82	43	1.573	1.165	1.688	2.544	3.204	2.293
WBGene00019965	R08F11.1	protein_coding	0.420972	0.095003	4.69408	0.00425851	387	436	543	657	721	530	20.988	22.076	26.188	30.953	28.175	28.267
WBGene00020219	T05A7.1	protein_coding	-1.02444	0.0952138	2.8487	0.00429155	312	167	172	120	115	85	16.92	8.456	8.295	5.654	4.494	4.533
WBGene00000683	col-109	protein_coding	0.615651	0.0952138	9.27166	0.00429498	7463	11413	12036	13599	21805	14101	404.73	577.886	580.477	640.687	852.094	752.07
WBGene00020182	ugt-53	protein_coding	-0.636216	0.0952138	2.30121	0.00429577	117	123	133	101	97	57	6.345	6.228	6.414	4.758	3.791	3.04
WBGene00000039	acn-1	protein_coding	0.665461	0.0952138	8.07803	0.00429793	2878	5270	5363	7522	8223	5948	156.079	266.841	258.649	354.383	321.338	317.234
WBGene00015153	B0348.5	protein_coding	0.762523	0.0957552	2.24063	0.00432839	61	65	97	112	175	110	3.308	3.291	4.678	5.277	6.839	5.867
WBGene00011641	T09A5.15	protein_coding	-0.460186	0.0957836	3.29193	0.00434107	206	248	243	174	212	146	11.172	12.557	11.719	8.198	8.285	7.787
WBGene00006928	vit-4	protein_coding	-1.60775	0.0957836	6.73898	0.00434174	5187	4611	2265	2607	1341	602	281.299	233.474	109.237	122.823	52.403	32.107
WBGene00006948	wrt-2	protein_coding	1.1808	0.0959536	5.67398	0.00435549	358	1266	699	1824	1630	1441	19.415	64.103	33.712	85.934	63.697	76.855
WBGene00017245	F08D12.1	protein_coding	0.538003	0.0959821	6.65433	0.00437967	1780	1743	1549	2118	3176	2481	96.532	88.255	74.706	99.785	124.111	132.323
WBGene00006788	unc-53	protein_coding	0.340097	0.0959821	5.61185	0.00437165	796	906	934	1121	1347	1031	43.168	45.874	45.045	52.813	52.638	54.988
WBGene00015307	C01G5.5	protein_coding	-0.505854	0.0959821	3.43464	0.00437304	275	251	255	218	212	149	14.914	12.709	12.298	10.271	8.285	7.947
WBGene00018744	F53B3.6	protein_coding	0.910066	0.0959821	5.29082	0.00438095	335	854	661	1250	1159	1006	18.168	43.241	31.879	58.891	45.291	53.655
WBGene00012547	Y37D8A.5	protein_coding	0.446359	0.096006	4.20989	0.00438809	286	294	387	461	521	392	15.51	14.886	18.664	21.719	20.36	20.907
WBGene00008027	scl-5	protein_coding	1.21932	0.0962552	0.912974	0.00440554	30	30	16	50	65	67	1.627	1.519	0.772	2.356	2.54	3.573
WBGene00020516	T15B7.1	protein_coding	-0.416477	0.0966048	6.86789	0.00443072	2299	2989	2942	2509	2264	1698	124.678	151.345	141.888	118.206	88.472	90.562
WBGene00018926	F56A11.6	protein_coding	0.446103	0.0966683	4.92255	0.00444879	505	534	533	654	914	693	27.387	27.039	25.706	30.812	35.717	36.961
WBGene00004458	rpn-1	protein_coding	0.33508	0.0966683	8.53429	0.00444876	6261	7137	6627	8294	10700	7596	339.544	361.375	319.609	390.754	418.134	405.129
WBGene00010133	F55H12.2	protein_coding	-0.760297	0.096716	3.71041	0.00445707	368	371	304	279	262	126	19.957	18.785	14.661	13.144	10.238	6.72
WBGene00004147	larp-5	protein_coding	0.32928	0.0968067	7.60084	0.00447615	3351	3545	3599	4303	5791	3860	181.73	179.498	173.574	202.726	226.3	205.871
WBGene00015280	C01B10.6	protein_coding	0.30139	0.0968067	6.83946	0.00447371	1936	2114	2207	2590	3224	2297	104.992	107.04	106.44	122.022	125.987	122.509
WBGene00000040	aco-1	protein_coding	0.379214	0.0968067	8.38855	0.00447953	4971	6398	6572	7854	8951	7410	269.585	323.957	316.957	370.024	349.786	395.209
WBGene00022820	ZK813.1	protein_coding	-1.90275	0.0970807	3.32745	0.00449833	559	425	261	309	82	49	30.315	21.519	12.588	14.558	3.204	2.613
WBGene00001215	ego-2	protein_coding	0.409228	0.0977106	6.79803	0.0045508	1961	1999	1891	2392	3428	2399	106.348	101.217	91.2	112.694	133.959	127.949
WBGene00015752	C14B9.2	protein_coding	0.401978	0.0977106	7.32768	0.00454114	2259	3154	3151	4108	4287	3339	122.509	159.7	151.968	193.539	167.527	178.084
WBGene00012094	T27E9.2	protein_coding	-0.370619	0.0977106	7.37409	0.00455603	3187	4370	3966	3182	3492	2609	172.836	221.271	191.274	149.913	136.46	139.15
WBGene00008511	F01G10.9	protein_coding	0.825579	0.0977106	4.99375	0.00454034	311	735	488	954	945	796	16.866	37.216	23.535	44.946	36.929	42.454
WBGene00016292	tbc-7	protein_coding	0.382444	0.0977106	5.3802	0.00455827	733	667	817	971	1229	839	39.752	33.773	39.403	45.747	48.027	44.748
WBGene00016534	C39D10.7	protein_coding	-0.640688	0.097908	7.39963	0.00457442	5606	3576	3850	3016	3379	2264	304.022	181.067	185.679	142.092	132.044	120.749
WBGene00006534	tba-8	protein_coding	2.01177	0.097908	-1.06469	0.00457981	2	5	7	18	17	27	0.108	0.253	0.338	0.848	0.664	1.44
WBGene00022083	Y69A2AR.12	protein_coding	-1.27045	0.0979627	-0.210429	0.00458853	26	25	30	16	14	6	1.41	1.266	1.447	0.754	0.547	0.32
WBGene00020966	W03A5.1	protein_coding	0.568745	0.0979835	4.42347	0.00459567	271	426	385	506	629	527	14.697	21.57	18.568	23.839	24.58	28.107
WBGene00006626	tsn-1	protein_coding	0.408866	0.0980005	9.46828	0.00460264	11674	13257	12364	15105	20770	16176	633.1	671.255	596.295	711.639	811.648	862.739
WBGene00021009	afd-1	protein_coding	0.332866	0.0982895	6.72486	0.00462976	1858	1900	1954	2404	3184	2037	100.762	96.205	94.238	113.259	124.424	108.642
WBGene00020026	R12C12.6	protein_coding	-0.454883	0.0982895	4.16862	0.00464097	441	432	402	359	345	272	23.916	21.874	19.388	16.913	13.482	14.507
WBGene00001794	gta-1	protein_coding	-0.340515	0.0982895	8.90958	0.00463926	9262	11730	12011	9667	10093	7468	502.293	593.937	579.271	455.439	394.413	398.302
WBGene00006585	tni-3	protein_coding	0.518171	0.0982895	6.086	0.00463709	968	1220	1269	1414	2150	1655	52.496	61.774	61.202	66.618	84.017	88.269
WBGene00000783	cpr-3	protein_coding	0.565222	0.0983705	4.22754	0.00465099	303	368	268	549	489	411	16.432	18.633	12.925	25.865	19.109	21.92
WBGene00021858	Y54F10BM.3	protein_coding	0.541383	0.0983801	5.40065	0.00466382	536	779	841	951	1347	968	29.068	39.444	40.56	44.804	52.638	51.628
WBGene00006537	tbb-2	protein_coding	0.442073	0.0983801	10.274	0.00466369	20150	23498	20858	26363	36731	28973	1092.77	1189.8	1005.95	1242.04	1435.37	1545.26
WBGene00022047	Y66H1A.5	protein_coding	-0.336273	0.0985109	5.07409	0.00467623	743	751	798	640	723	543	40.294	38.026	38.486	30.152	28.253	28.961
WBGene00009165	gpx-1	protein_coding	-0.398498	0.0987438	4.85025	0.0046935	592	640	784	552	583	461	32.105	32.406	37.811	26.006	22.782	24.587
WBGene00012121	T28C6.7	protein_coding	0.300045	0.0992247	7.96415	0.00472261	4066	4787	4821	5765	7022	4906	220.506	242.385	232.509	271.605	274.405	261.659
WBGene00004098	pqn-2	protein_coding	-0.967943	0.0993973	3.77934	0.00473708	461	294	433	142	334	183	25.001	14.886	20.883	6.69	13.052	9.76
WBGene00004413	rpl-2	protein_coding	0.370832	0.0997187	11.2243	0.00475867	36224	44897	47193	53803	67667	51617	1964.49	2273.32	2276.04	2534.81	2644.28	2752.97
